# Supplementary material
Source: PubMed Central journal article supplement (PMC4422498)
Supplement: NIHMS684575-supplement-Supplementary_Information.pdf [file NIHMS684575-supplement-Supplementary_Information.pdf]

"

\*\*\*\*\*"CQPVGPVU"

## **SUPPLEMENTARY TABLES** **2**

|                                                                                                                                            |    |
|--------------------------------------------------------------------------------------------------------------------------------------------|----|
| Supplementary Table 1   DNA oligos used in construction of synthetic auxotrophs                                                            | 2  |
| Supplementary Table 2   Enzyme variants from computational design for MAGE oligos and gene synthesis                                       | 6  |
| Supplementary Table 3   DNA sequences for construction of synthetic genes and <i>asd</i> and <i>thyA</i> natural metabolic auxotrophs      | 7  |
| Supplementary Table 4   Templates, mutations, escape frequencies in SC, doubling times, and escapee doubling times of synthetic auxotrophs | 16 |
| Supplementary Table 5   Escape frequencies of synthetic auxotrophs in SCA                                                                  | 17 |
| Supplementary Table 6   Codon and amino acid frequencies for UAG saturation mutagenesis                                                    | 18 |
| Supplementary Table 7   Doubling times of leucine and tryptophan variants of <i>adk.d6</i> , <i>tyrS.d7</i> and <i>tyrS.d8</i>             | 33 |
| Supplementary Table 8   Viability of <i>adk</i> synthetic auxotrophs in stationary phase                                                   | 34 |
| Supplementary Table 9   Escape mechanisms uncovered by whole-genome sequencing                                                             | 35 |
| Supplementary Table 10   <i>tyrS.A70V</i> growth rates                                                                                     | 36 |
| Supplementary Table 11   Escape and growth rates of natural metabolic auxotrophs                                                           | 37 |
| Supplementary Table 12   Allele reversion frequencies in conjugal escapees                                                                 | 38 |

## **SUPPLEMENTARY DISCUSSION** **39**

|                                                                  |    |
|------------------------------------------------------------------|----|
| Structure determination of a NSAA-dependent enzyme               | 39 |
| Competition between synthetic auxotroph escapees and prototrophs | 40 |
| Quadruplet codon decoding                                        | 41 |
| <i>adk.d4</i> exhibits poor survivability in stationary phase    | 41 |

## **SUPPLEMENTARY REFERENCES** **43**

Supplementary Table 1 | DNA oligos used in construction of synthetic auxotrophs

Table with 3 columns: DNA name, Sequence, and Purpose. It lists various oligos for different genes like Oligo1, TAG, Tdk, and TyrS, used in the construction of synthetic auxotrophs.

Table with columns for primer names (e.g., tvrS\_wt.seq-f), primer sequences, and descriptions (e.g., Primer to screen for the presence of wt tvrS sequence). The table contains numerous entries for various primers used in the study.

|                        |                                                                                     |                                                                                                                                                                                                |
|------------------------|-------------------------------------------------------------------------------------|------------------------------------------------------------------------------------------------------------------------------------------------------------------------------------------------|
| p7 F03                 | caagcagaagacggccatcagagatctgactgactggaagttcaagctgtgctctccgact                       | Primer to amplify NNN Illumina library and sequencing primer for P7 read (index 63)                                                                                                            |
| p7 F04                 | caagcagaagacggccatcagagatctgactgactggaagttcaagctgtgctctccgact                       | Primer to amplify NNN Illumina library and sequencing primer for P7 read (index 64)                                                                                                            |
| p7 F05                 | caagcagaagacggccatcagagatctgactgactggaagttcaagctgtgctctccgact                       | Primer to amplify NNN Illumina library and sequencing primer for P7 read (index 65)                                                                                                            |
| p7 F06                 | caagcagaagacggccatcagagatctgactgactggaagttcaagctgtgctctccgact                       | Primer to amplify NNN Illumina library and sequencing primer for P7 read (index 66)                                                                                                            |
| p7 F07                 | caagcagaagacggccatcagagatctgactgactggaagttcaagctgtgctctccgact                       | Primer to amplify NNN Illumina library and sequencing primer for P7 read (index 67)                                                                                                            |
| p7 F08                 | caagcagaagacggccatcagagatctgactgactggaagttcaagctgtgctctccgact                       | Primer to amplify NNN Illumina library and sequencing primer for P7 read (index 68)                                                                                                            |
| p7 F09                 | caagcagaagacggccatcagagatctgactgactggaagttcaagctgtgctctccgact                       | Primer to amplify NNN Illumina library and sequencing primer for P7 read (index 69)                                                                                                            |
| p7 F10                 | caagcagaagacggccatcagagatctgactgactggaagttcaagctgtgctctccgact                       | Primer to amplify NNN Illumina library and sequencing primer for P7 read (index 70)                                                                                                            |
| p7 F11                 | caagcagaagacggccatcagagatctgactgactggaagttcaagctgtgctctccgact                       | Primer to amplify NNN Illumina library and sequencing primer for P7 read (index 71)                                                                                                            |
| p7 F12                 | caagcagaagacggccatcagagatctgactgactggaagttcaagctgtgctctccgact                       | Primer to amplify NNN Illumina library and sequencing primer for P7 read (index 72)                                                                                                            |
| p7 G01                 | caagcagaagacggccatcagagatctgactgactggaagttcaagctgtgctctccgact                       | Primer to amplify NNN Illumina library and sequencing primer for P7 read (index 73)                                                                                                            |
| p7 G02                 | caagcagaagacggccatcagagatctgactgactggaagttcaagctgtgctctccgact                       | Primer to amplify NNN Illumina library and sequencing primer for P7 read (index 74)                                                                                                            |
| p7 G03                 | caagcagaagacggccatcagagatctgactgactggaagttcaagctgtgctctccgact                       | Primer to amplify NNN Illumina library and sequencing primer for P7 read (index 75)                                                                                                            |
| p7 G04                 | caagcagaagacggccatcagagatctgactgactggaagttcaagctgtgctctccgact                       | Primer to amplify NNN Illumina library and sequencing primer for P7 read (index 76)                                                                                                            |
| p7 G05                 | caagcagaagacggccatcagagatctgactgactggaagttcaagctgtgctctccgact                       | Primer to amplify NNN Illumina library and sequencing primer for P7 read (index 77)                                                                                                            |
| p7 G06                 | caagcagaagacggccatcagagatctgactgactggaagttcaagctgtgctctccgact                       | Primer to amplify NNN Illumina library and sequencing primer for P7 read (index 78)                                                                                                            |
| p7 G07                 | caagcagaagacggccatcagagatctgactgactggaagttcaagctgtgctctccgact                       | Primer to amplify NNN Illumina library and sequencing primer for P7 read (index 79)                                                                                                            |
| p7 G08                 | caagcagaagacggccatcagagatctgactgactggaagttcaagctgtgctctccgact                       | Primer to amplify NNN Illumina library and sequencing primer for P7 read (index 80)                                                                                                            |
| p7 G09                 | caagcagaagacggccatcagagatctgactgactggaagttcaagctgtgctctccgact                       | Primer to amplify NNN Illumina library and sequencing primer for P7 read (index 81)                                                                                                            |
| p7 G10                 | caagcagaagacggccatcagagatctgactgactggaagttcaagctgtgctctccgact                       | Primer to amplify NNN Illumina library and sequencing primer for P7 read (index 82)                                                                                                            |
| p7 G11                 | caagcagaagacggccatcagagatctgactgactggaagttcaagctgtgctctccgact                       | Primer to amplify NNN Illumina library and sequencing primer for P7 read (index 83)                                                                                                            |
| p7 G12                 | caagcagaagacggccatcagagatctgactgactggaagttcaagctgtgctctccgact                       | Primer to amplify NNN Illumina library and sequencing primer for P7 read (index 84)                                                                                                            |
| p7 H01                 | caagcagaagacggccatcagagatctgactgactggaagttcaagctgtgctctccgact                       | Primer to amplify NNN Illumina library and sequencing primer for P7 read (index 85)                                                                                                            |
| p7 H02                 | caagcagaagacggccatcagagatctgactgactggaagttcaagctgtgctctccgact                       | Primer to amplify NNN Illumina library and sequencing primer for P7 read (index 86)                                                                                                            |
| p7 H03                 | caagcagaagacggccatcagagatctgactgactggaagttcaagctgtgctctccgact                       | Primer to amplify NNN Illumina library and sequencing primer for P7 read (index 87)                                                                                                            |
| p7 H04                 | caagcagaagacggccatcagagatctgactgactggaagttcaagctgtgctctccgact                       | Primer to amplify NNN Illumina library and sequencing primer for P7 read (index 88)                                                                                                            |
| p7 H05                 | caagcagaagacggccatcagagatctgactgactggaagttcaagctgtgctctccgact                       | Primer to amplify NNN Illumina library and sequencing primer for P7 read (index 89)                                                                                                            |
| p7 H06                 | caagcagaagacggccatcagagatctgactgactggaagttcaagctgtgctctccgact                       | Primer to amplify NNN Illumina library and sequencing primer for P7 read (index 90)                                                                                                            |
| p7 H07                 | caagcagaagacggccatcagagatctgactgactggaagttcaagctgtgctctccgact                       | Primer to amplify NNN Illumina library and sequencing primer for P7 read (index 91)                                                                                                            |
| p7 H08                 | caagcagaagacggccatcagagatctgactgactggaagttcaagctgtgctctccgact                       | Primer to amplify NNN Illumina library and sequencing primer for P7 read (index 92)                                                                                                            |
| p7 H09                 | caagcagaagacggccatcagagatctgactgactggaagttcaagctgtgctctccgact                       | Primer to amplify NNN Illumina library and sequencing primer for P7 read (index 93)                                                                                                            |
| p7 H10                 | caagcagaagacggccatcagagatctgactgactggaagttcaagctgtgctctccgact                       | Primer to amplify NNN Illumina library and sequencing primer for P7 read (index 94)                                                                                                            |
| p7 H11                 | caagcagaagacggccatcagagatctgactgactggaagttcaagctgtgctctccgact                       | Primer to amplify NNN Illumina library and sequencing primer for P7 read (index 95)                                                                                                            |
| p7 H12                 | caagcagaagacggccatcagagatctgactgactggaagttcaagctgtgctctccgact                       | Primer to amplify NNN Illumina library and sequencing primer for P7 read (index 96)                                                                                                            |
| ME-Plus9-kanoriT-r     | /5Phos/ctctctcttcaaacactcaaccactgctgacggaagatcactctg                                | Mosaic end primers for kanoriT amplification (EZ-Tn5 custom transposome prep)                                                                                                                  |
| ME-Plus9-kanoriT-r     | /5Phos/ctctctcttcaaacactcaaccactgctgacggaagatcactctg                                | Mosaic end primers for kanoriT amplification (EZ-Tn5 custom transposome prep)                                                                                                                  |
| kanR_seqOUT-Nr1        | catcggtctccaccat                                                                    | Nested PCR primer for enrichment of flanking genomic DNA around Tn5-kanR-oriT integration sites                                                                                                |
| kanR_seqOUT-Nr2        | gaatttaacagggccc                                                                    | Nested PCR primer for enrichment of flanking genomic DNA around Tn5-kanR-oriT integration sites                                                                                                |
| kanR_seqOUT-Nr3        | tcttccggtgaaatgagtc                                                                 | Nested PCR primer for enrichment of flanking genomic DNA around Tn5-kanR-oriT integration sites; sequencing primer for identifying flanking genomic DNA around Tn5-kanR-oriT integration sites |
| murF-TAG-f             | ctttcaggaagcagtcagatctgattg                                                         | masPCR primer to screen for conjugation-mediated UAG reversion                                                                                                                                 |
| yaiS-TAG-f             | cttgcgcaaaaatacaataaactag                                                           | masPCR primer to screen for conjugation-mediated UAG reversion                                                                                                                                 |
| lon-TAG-f              | tatcgaggttgactcaaaatag                                                              | masPCR primer to screen for conjugation-mediated UAG reversion                                                                                                                                 |
| adk-TAG wt-f correct1  | ccctcagatgacgcaccct                                                                 | masPCR primer to screen for conjugation-mediated adk escape                                                                                                                                    |
| ybhS-TAG-f             | ccaacctcgcctgaaag                                                                   | masPCR primer to screen for conjugation-mediated UAG reversion                                                                                                                                 |
| loIA-TAG-f             | tcacgtagatctcaacaaatagag                                                            | masPCR primer to screen for conjugation-mediated UAG reversion                                                                                                                                 |
| ycaI-TAG-f             | tgccagtgataaagcgtag                                                                 | masPCR primer to screen for conjugation-mediated UAG reversion                                                                                                                                 |
| fabH-TAG-f             | cgccctgctcttcttaa                                                                   | masPCR primer to screen for conjugation-mediated UAG reversion                                                                                                                                 |
| hemA-TAG-f             | gcctcggctggagtag                                                                    | masPCR primer to screen for conjugation-mediated UAG reversion                                                                                                                                 |
| global.prfA-f          | gcgcgtaagtgtatcttgc                                                                 | masPCR primer to screen for conjugation-mediated reversion of wt prfA                                                                                                                          |
| pspF-TAG-f             | ctgtttgaaaaaccagaaatag                                                              | masPCR primer to screen for conjugation-mediated UAG reversion                                                                                                                                 |
| tyrS-TAG wt-f          | gcgcgccagatgtagt                                                                    | masPCR primer to screen for conjugation-mediated tyrS escape                                                                                                                                   |
| ydiE-TAG-f             | cgccctgctcttcttaa                                                                   | masPCR primer to screen for conjugation-mediated UAG reversion                                                                                                                                 |
| resC-TAG-f             | gaaatccgcggatgtag                                                                   | masPCR primer to screen for conjugation-mediated UAG reversion                                                                                                                                 |
| hda-TAG-f              | ctgtttgaaaaaccagaaatag                                                              | masPCR primer to screen for conjugation-mediated UAG reversion                                                                                                                                 |
| srIE-TAG-f             | ggtttctcctgttttactataataa                                                           | masPCR primer to screen for conservation of UAA alleles during conjugation                                                                                                                     |
| nlpI-TAG-f             | gcgaalccgagccagcaataa                                                               | masPCR primer to screen for conservation of UAA alleles during conjugation                                                                                                                     |
| mreC-TAG-f             | cgccgggagccaaata                                                                    | masPCR primer to screen for conservation of UAA alleles during conjugation                                                                                                                     |
| xyIR-TAG-f             | gatgtaaatgacgagctgattgtaa                                                           | masPCR primer to screen for conservation of UAA alleles during conjugation                                                                                                                     |
| coaD-TAG-f             | ctgatgccaagtagcttaa                                                                 | masPCR primer to screen for conservation of UAA alleles during conjugation                                                                                                                     |
| yidS-TAG-f             | gcacatctccaggttgaagattaa                                                            | masPCR primer to screen for conservation of UAA alleles during conjugation                                                                                                                     |
| rbsB-TAG-f             | atctgaaactggtttaaagcagta                                                            | masPCR primer to screen for conservation of UAA alleles during conjugation                                                                                                                     |
| b4283-TAG-f            | tggaagatgaaatataaaagcactgtag                                                        | masPCR primer to screen for conservation of UAA alleles during conjugation                                                                                                                     |
| murF-TAA-f             | ctttacggaagatggaacattgtaa                                                           | reverse masPCR primer for conjugation assay                                                                                                                                                    |
| yaiS-TAA-f             | cttgcgcaaaaatacaataaactag                                                           | reverse masPCR primer for conjugation assay                                                                                                                                                    |
| lon-TAA-f              | tatcgaggttgactcaaaatag                                                              | reverse masPCR primer for conjugation assay                                                                                                                                                    |
| adk-TAG mut-f correct1 | ccatcagatgacgcaccgta                                                                | reverse masPCR primer for conjugation assay                                                                                                                                                    |
| ybhS-TAA-f             | ccaacctcgcctgaaatag                                                                 | reverse masPCR primer for conjugation assay                                                                                                                                                    |
| loIA-TAA-f             | tcacgtagatctcaacaaatagag                                                            | reverse masPCR primer for conjugation assay                                                                                                                                                    |
| ycaI-TAA-f             | tgccagtgataaagcgtag                                                                 | reverse masPCR primer for conjugation assay                                                                                                                                                    |
| fabH-TAA-f             | cgccctgctcttcttaa                                                                   | reverse masPCR primer for conjugation assay                                                                                                                                                    |
| hemA-TAA-f             | gcctcggctggagtag                                                                    | reverse masPCR primer for conjugation assay                                                                                                                                                    |
| pspF-TAA-f             | ctgtttgaaaaaccagaaatag                                                              | reverse masPCR primer for conjugation assay                                                                                                                                                    |
| tyrS-TAG mut-f         | gcgcgccagatgtagt                                                                    | reverse masPCR primer for conjugation assay                                                                                                                                                    |
| ydiE-TAA-f             | cgccctgctcttcttaa                                                                   | reverse masPCR primer for conjugation assay                                                                                                                                                    |
| resC-TAA-f             | gaaatccgcggatgtag                                                                   | reverse masPCR primer for conjugation assay                                                                                                                                                    |
| hda-TAA-f              | ctgtttgaaaaaccagaaatag                                                              | reverse masPCR primer for conjugation assay                                                                                                                                                    |
| srIE-TAA-f             | ggtttctcctgttttactataataa                                                           | reverse masPCR primer for conjugation assay                                                                                                                                                    |
| nlpI-TAA-f             | gcgaalccgagccagcaataa                                                               | reverse masPCR primer for conjugation assay                                                                                                                                                    |
| mreC-TAA-f             | cgccgggagccaaata                                                                    | reverse masPCR primer for conjugation assay                                                                                                                                                    |
| xyIR-TAA-f             | gatgtaaatgacgagctgattgtaa                                                           | reverse masPCR primer for conjugation assay                                                                                                                                                    |
| coaD-TAA-f             | ctgatgccaagtagcttaa                                                                 | reverse masPCR primer for conjugation assay                                                                                                                                                    |
| yidS-TAA-f             | gcacatctccaggttgaagattaa                                                            | reverse masPCR primer for conjugation assay                                                                                                                                                    |
| rbsB-TAA-f             | atctgaaactggtttaaagcagta                                                            | reverse masPCR primer for conjugation assay                                                                                                                                                    |
| b4283-TAA-f            | tggaagatgaaatataaaagcactgtag                                                        | reverse masPCR primer for conjugation assay                                                                                                                                                    |
| murF-r                 | gacggtaaacccaccagc                                                                  | reverse masPCR primer for conjugation assay                                                                                                                                                    |
| yaiS-r                 | agttagggaatgcccgc                                                                   | reverse masPCR primer for conjugation assay                                                                                                                                                    |
| lon-r                  | ccctcacaacccttaataaagg                                                              | reverse masPCR primer for conjugation assay                                                                                                                                                    |
| adk-TAG-r              | gaaataacgcaaaatgag                                                                  | reverse masPCR primer for conjugation assay                                                                                                                                                    |
| ybhS-r                 | cttctgttagttgggttctct                                                               | reverse masPCR primer for conjugation assay                                                                                                                                                    |
| loIA-r                 | ctcaaccatagaccagag                                                                  | reverse masPCR primer for conjugation assay                                                                                                                                                    |
| ycaI-r                 | acgcaaacgattatagtag                                                                 | reverse masPCR primer for conjugation assay                                                                                                                                                    |
| fabH-r                 | gttaaagatgatttctcaactactg                                                           | reverse masPCR primer for conjugation assay                                                                                                                                                    |
| hemA-r                 | atgttgaaagttgctctcg                                                                 | reverse masPCR primer for conjugation assay                                                                                                                                                    |
| global.prfA-r          | agccgttctcgattacc                                                                   | reverse masPCR primer for conjugation assay                                                                                                                                                    |
| pspF-r                 | aaagaaagccttccgcc                                                                   | reverse masPCR primer for conjugation assay                                                                                                                                                    |
| tyrS-TAG-r             | tcaagaaacgctgaacagg                                                                 | reverse masPCR primer for conjugation assay                                                                                                                                                    |
| ydiE-r                 | catttgatgactgtttgcc                                                                 | reverse masPCR primer for conjugation assay                                                                                                                                                    |
| resC-r                 | agtgcacttaagctgcag                                                                  | reverse masPCR primer for conjugation assay                                                                                                                                                    |
| hda-r                  | cgaaactactgaaactctgcgtag                                                            | reverse masPCR primer for conjugation assay                                                                                                                                                    |
| srIE-r                 | ggaatgagctacattcaac                                                                 | reverse masPCR primer for conjugation assay                                                                                                                                                    |
| nlpI-r                 | tgaaatgatgcaaaatcttcaaaaag                                                          | reverse masPCR primer for conjugation assay                                                                                                                                                    |
| mreC-r                 | gacgttaatacctaaactctgcc                                                             | reverse masPCR primer for conjugation assay                                                                                                                                                    |
| xyIR-r                 | gataaagccttaccgcc                                                                   | reverse masPCR primer for conjugation assay                                                                                                                                                    |
| coaD-r                 | gatgtaaacgagctatttc                                                                 | reverse masPCR primer for conjugation assay                                                                                                                                                    |
| yidS-r                 | ttacctgctgctgttct                                                                   | reverse masPCR primer for conjugation assay                                                                                                                                                    |
| rbsB-r                 | caagctaacctcaaccca                                                                  | reverse masPCR primer for conjugation assay                                                                                                                                                    |
| b4283-r                | cgaaatcaccgtagaacatttaaaagc                                                         | reverse masPCR primer for conjugation assay                                                                                                                                                    |
| mutS null mut-2*       | a*c*cccatgagctcaatgaaatctggagcccaatgcccctatgagcagcgtatgctcgaaagcccacatcccgatctgctgc | MAGE oligo to inactivate mutS                                                                                                                                                                  |
| mutS null revert-2*    | a*c*cccatgagctcaatgaaatctggagcccaatgcccctatgagcagcgtatgctcgaaagcccacatcccgatctgctgc | MAGE oligo to reactivate mutS                                                                                                                                                                  |
| mutS-2 ascPCR wt-f     | ccatgatacagagctatctag                                                               | Wild-type forward ascPCR primer for mutS reversion                                                                                                                                             |
| mutS-2 ascPCR mut-f    | ccatgatacagagctatctag                                                               | Mutant forward ascPCR primer for mutS inactivation                                                                                                                                             |
| mutS-2 ascPCR-r        | aggttctctgactcctc                                                                   | Reverse ascPCR primer for mutS logging                                                                                                                                                         |
| pEVOL-UCUA1-f          | agggcagaagcgcgactcttaaatcccatgacaggggt                                              | primers for isothermal construction of quadruplet codon variant of pEVOL-bipA                                                                                                                  |
| PEVOL-UCUA1-r          | gagtatgaaagatgactgaagcccaaatgactccctg                                               | primers for isothermal construction of quadruplet codon variant of pEVOL-bipA                                                                                                                  |

|                            |                                                                                    |                                                                                                 |
|----------------------------|------------------------------------------------------------------------------------|-------------------------------------------------------------------------------------------------|
| pEVOL-UCUA2-f              | cagggatatttgccttcaaccatctttcaatic                                                  | primers for isothermal construction of quaruplet codon variant of pEVOL-bipA                    |
| pEVOL-UCUA2-r              | acccttgcctatcggaattagaagtcgcccttgcct                                               | primers for isothermal construction of quaruplet codon variant of pEVOL-bipA                    |
| adk(tdk)-Nf                | atcgcttttcaaaaaatgacacatttaagg                                                     | primers for adk UAG cassette construction                                                       |
| adk uga variant-Nr         | tttgaacatgaccgaattctacgctctcatctgafgg                                              | primers for adk UAG cassette construction                                                       |
| adk uga variant-Cf         | ccatcagatgacagaccgtagaafcggctacgtttcca                                             | primers for adk UAG cassette construction                                                       |
| adk DEF seq-f              | ggaatcncgaattgaga                                                                  | primers for adk UAG cassette construction                                                       |
| tyrS d8-A70V-Nr            | gacccttggcgcgcctaccagagacaccgcttfgccc                                              | primers for isothermal construction of tyrS d8-A70V variant to confirm escape mechanism         |
| tyrS d8-A70V-Cf            | ggccacaagccgcttctctgatagacggcggacggate                                             | primers for isothermal construction of tyrS d8-A70V variant to confirm escape mechanism         |
| Dlon.kanR-f                | cagctgtctcatctgattctgacggaataaactaaggagctctctgtgacggaagatactt                      | primers for deletion of Lon protease (lambda red recombination)                                 |
| Dlon.kanR-r                | cccgaatgacctccagccctttttatagctcattttgccgagctcaaccagacataaagcg                      | primers for deletion of Lon protease (lambda red recombination)                                 |
| lon.seq-f                  | ctctattctgcgcttaagtg                                                               | primers to validate Dlon::kanR recombinants                                                     |
| lon.seq-r                  | cacttgaatcttcaagtagc                                                               | primers to validate Dlon::kanR recombinants                                                     |
| adk.d6-TAG178TGG           | c*+tcttttggaaACtgcaccgatCCAgctgtcTGTcatctgatttcaaccagagctttacgtctctctgatcatctttac  | MAGE oligo to convert adk.d6 bipA->Trp                                                          |
| adk.d6-TAG178CTG           | c*+tcttttggaaACtgcaccgatCAGcgtgtcTGTcatctgatttcaaccagagctttacgtctctctgatcatctttac  | MAGE oligo to convert adk.d6 bipA->Leu                                                          |
| tyrS.d7-TAG303TGG          | t*g*+aaaccttctcaactgaaaccagagatTACctgtccgcCAGatcactgagcgcgcgctgtttaccgctttttatctct | MAGE oligo to convert tyrS.d7 bipA->Trp                                                         |
| tyrS.d7-TAG303CTG          | t*g*+aaaccttctcaactgaaaccagagatTACctgtccgcCAGatcactgagcgcgcgctgtttaccgctttttatctct | MAGE oligo to convert tyrS.d7 bipA->Leu                                                         |
| tyrS.d8-TAG303TGG          | t*g*+aaaccttctcaactgaaaccagagatTGCctgtccgcCAGatcactgagcgcgcgctgtttaccgctttttatctct | MAGE oligo to convert tyrS.d8 bipA->Trp                                                         |
| tyrS.d8-TAG303CTG          | t*g*+aaaccttctcaactgaaaccagagatTGCctgtccgcCAGatcactgagcgcgcgctgtttaccgctttttatctct | MAGE oligo to convert tyrS.d8 bipA->Leu                                                         |
| Didk.ParaBAD-aaRS-f        | aggcttctgaagggaaccgcatataccactctgtctacttgcagggatcattttgcg                          | primers for Didk.bipARS genomic integration (lambda red recombination)                          |
| Didk.bipARS-r              | gagaagggtatataccgggaagatcgttaaaccaactgacattacaagctttaccgagtcg                      | primers for Didk.bipARS genomic integration (lambda red recombination)                          |
| tdk.tRNA <sup>cat</sup> -f | ttccggaagaactgacaaaactctggaaccgatccgtaaacctctgtaagccagttttcctcagctc                | primers for Didk.tRNA <sup>cat</sup> genomic integration (lambda red recombination)             |
| tdk.tRNA <sup>cat</sup> -r | gagaagggtatataccgggaagatcgttaaaccaactgacattacaagggaggaactct                        | primers for Didk.tRNA <sup>cat</sup> genomic integration (lambda red recombination)             |
| C-term2-vector-f           | aaaaacgcctagcgggaagaactgatcaaaactctggaaccgatcgtlaaacctctgtaactcagtttcaaacgcta      | primers for amplifying pEVOL backbone to prepare pEVOL-bipARS.d7                                |
| C-term2-vector-r           | cgggttctctcaacaacae                                                                | primers for amplifying pEVOL backbone to prepare pEVOL-bipARS.d7                                |
| C-term2-VAG-f              | gaaatcaaaaagcgtactcccggcggtgtttgaaagtaaccggtnccnagaatcgmaaatcctctggaataacc         | primers used to produce library of bipA-dependent bipARS genes from which we isolated bipARS.d7 |
| C-term2-TAG-f              | gaaatcaaaaagcgtactcccggcggtgtttgaaagtaaccggtnccnagaatcgmaaatcctctggaataacc         | primers used to produce library of bipA-dependent bipARS genes from which we isolated bipARS.d7 |
| C-term2-AAG-f              | gaaatcaaaaagcgtactcccggcggtgtttgaaagtaaccggtnccnagaatcgmaaatcctctggaataacc         | primers used to produce library of bipA-dependent bipARS genes from which we isolated bipARS.d7 |
| C-term2-GAB-r              | attttgatcgttctccpctacgcgttttngaacacatcggctcagttcttttttgaacagagattcctctcgtaaag      | primers used to produce library of bipA-dependent bipARS genes from which we isolated bipARS.d7 |
| C-term2-GGB-r              | attttgatcgttctccpctacgcgttttncacagcatcggctcagttcttttttgaacagagattcctctcgtaaag      | primers used to produce library of bipA-dependent bipARS genes from which we isolated bipARS.d7 |
| aaRS1.seq-f                | ttttcatacccccacc                                                                   | Sanger sequencing primers to validate engineered bipARS genotypes                               |
| aaRS1.seq-r                | ggagaccgttaactcaatgatg                                                             | Sanger sequencing primers to validate engineered bipARS genotypes                               |
| aaRS2.seq-f                | ggtcatcaatccccaatgac                                                               | Sanger sequencing primers to validate engineered bipARS genotypes                               |
| aaRS2.seq-r                | ggtcactacgctgaaiaagtg                                                              | Sanger sequencing primers to validate engineered bipARS genotypes                               |

### Supplementary Table 2 | Enzyme variants from computational design for MAGE oligos and gene synthesis

| Enzyme | Template (chain_ID) | Variants              |                    |                       |                            |           |
|--------|---------------------|-----------------------|--------------------|-----------------------|----------------------------|-----------|
| holB   | 1A5T_A              | A190bipA              | F205A,V            | W210G,A               | E214E,L                    |           |
| alaS   | 3HY0_A              | F89F,A                | F292F,A            | L337bipA              | M341M,A                    | L348L,V,A |
| metG   | 3H99_A              | F481A                 | M485A              | F502A,G,V             | L503bipA                   |           |
| pgk    | 1ZMR_A              | V185V,A<br>I303V,A    | I187V,A<br>V309V,A | I211A,G<br>V324A      | L293A<br>I328V,A           | L297bipA  |
| adk    | 1E4V_A              | I4A<br>T175T,F        | L6V,A<br>L178bipA  | M96M,L<br>Y182V,A     | V103V,A<br>T191T,M         | V106V,A   |
| tyrS   | 2YXN_A              | L49L,A,M<br>F271F,L,W | L52L,V<br>F275G    | F236F,A,M<br>L303bipA | W260A,F,G<br>V307A,G,L,M,V | T263T,A,V |
| bipARS | 2PXH_A              | I240V,T,A<br>V290bipA | M241A              | A244G                 | L272G                      | L286A,G   |



### Supplementary Table 3 | DNA sequences for construction of synthetic genes and *asd* and *thyA* natural metabolic auxotrophs

>tyrS-1 (fragment 1 of tyrS dependence variant pool with codons targeted for diversification highlighted)  
 AAAAGTCGTGTACCGGCAAAGGTGCAGTCGTTATATACATGGAGATTTTGatgGCAAGCAGTAACTTG  
 ATTAACAATTGCAAGAGCGGGGGCTGGTAGCCAGGTGACGGACGAGGAAGCGTTAGCAGAGCG  
 ACTGGCGCAAGGCCCGATCGCGCTCTATTGCGGCTTCGATCCTACCGCTGACAGCTTGCATTTGGG  
 GCATCTTGTTCCATTGTTATGCCTGAAACGCTTCCAGCAGGCGGGCC

>tyrS-2 (fragment 1 of tyrS dependence variant pool with codons targeted for diversification highlighted)  
 GTTCCATTGTTATGCCTGAAACGCTTCCAGCAGGCGGGCCACAAGCCGGTTGCGCTGGTAGGCGGG  
 GCGACGGGTCTGATTGGCGACCCGAGCTTCAAAGCTGCCGAGCGTAAGCTGAACACCGAAGAACT  
 GTTCAGGAGTGGGTGGACAAAATCCGTAAGCAGGTTGCCCGTTCCTCGATTTGACTGTGGAGAA  
 AACTCTGCTATCGCGGCGAACAACATGACTGGTTCGGCAATATGAATGTGCTGACCTTCTGCGCG  
 ATATTGGCAAACACTTCTCCGTTAACAGATGATCAACAAAGAAGCGGTTAAGCAGCGTCTCAACCG  
 TGAAGATCAGGGGATTTTCGTTCACTGAGTTTTCTACAACCTGTTGCAGGGTTATGACTTCGCCTGTC  
 TGAACAAACAGTACGGTGTGGTGTGCAAATTGGTGGTTCTGACCAGTGGGGTAACATCACTTCTGG  
 TATCGACCTGACCCGTCGTCTGCATCAGAATCAGGTGTTTGGCCTGACCGTTCCGCTGATCACTAAA  
 GCAGATGGCACCAAATTTGGTAAACTGAAGGCGGCGCAGTCTGGTTGGATCCGAAGAAAACAGC  
 CCGTACAAA

>tyrS-3 (fragment 1 of tyrS dependence variant pool with codons targeted for diversification highlighted)  
 CGCAGTCTGGTTGGATCCGAAGAAAACAGCCCGTACAAATTCTACCAGTTCTGGATCAACACTGCG  
 GATGCCGACGTTTACCGCTTCCTGAAGTTCCTACCTTTATGAGCATTGAAGAGATCAACGCCCTGG  
 AAGAAGAAGATAAAAACAGCGGTAAAGCACCGCGCGCCAGT

>tyrS-4 (fragment 1 of tyrS dependence variant pool with codons targeted for diversification highlighted)  
 GAAGAAGATAAAAACAGCGGTAAAGCACCGCGCGCCAGTATGTACTGCGGAGCAGGTGACTCGT  
 CTGGTTACCGGTGAAGAAGGTTTACAGGCGGCAAACGTATTACCGAATGCCTGTTACGCGGTTCTT  
 TGAGTGCCTGAGTGAAGCGGACTTCAACAGCTGGCGCAGGACGCGGTACCGATGGTTGAGATG  
 GAAAAGGGCGCAGACCTGATGCAGGCACTGGTCGATTCTGAACTGCAACCTTCCCGTGGTCAGGCA  
 CGTAAACTATCGCCTCCAATGCCATCACCATTAACGGTGAAAAACAGTCCGATCCTGAATACTTCTT  
 TAAAGAAGAAGATCGTCTGTTTGGTCGTTTTACCTTACTGCGTCGCGGTAAAAGAATTACTGTCTGA  
TTTGCTGGAAAtaaTGCA

>tyrS\_block1 (gBlock 1 for constructing recoded tyrS gene for tyrS+tdk cassette)  
 gcccgatcgctctattgcggttcgatcctaccgctgacagcttgcatCTGGGACACCTGGTCCCGCTTTTGTGTCTCAAG  
 AGGTTTCAACAAGCTGGTCATAAACCAGTCGCTCTAGTCGGTGGAGCTACCGGGCTAATCGGGGAT  
 CCCTCCTTTAAGGCAGCTGAACGCAAACCTAATACAGAGGAGACGGTGAAGAATGGGTGCGATAAGA  
 TACGAAAACAAGTAGCGCCATTTTTGGACTTTGATTGCGGCGAGAATTGCGCAATAGCCGCTAATAA  
 TTACGATTGGTTTGGAAACATGAACGTACTTACTTTTTGCGGGACATAGGGAAGCATTTTAGCGTGA  
 ATCAAATGATAAATAAGGAGGCCGTCAAACAAAGACTGAATCGCGAGGACCAAGGTATCAGCTTTAC  
 AGAATTCTCGTATAATCTTTTACAAGGGTACGATTTTGCATGCCTTAATAAGCAATATGGAGTGCCTCT  
 ACAGATAGGAGGAAGTGAATGGGGAAATATTACGTGCGGAATAGATTTGACACGCCGCCTCCAC  
 CAAAACCAAGTCTTCGGTCTCACGGTGCCTCTTATTACGAAGGCTGACGGGACGAAGTTCGGCAAG  
 ACCGAGGGTGGTGCCTGTGGCTAGACCCAAAAAAGACTTCGCCTTATAAGTTTTATCAATTTTGA  
 TTAATACGGCCGACGCTGATGTCTATCGTTTTCTCAAATTTTTTACTTTTCATGTCCATCGAGG

>tyrS\_block2 (gBlock 2 for constructing recoded tyrS gene for tyrS+tdk cassette)  
 TATCGTTTTCTCAAATTTTTTACTTTTCATGTCCATCGAGGAAATTAATGCGCTCGAGGAGGAGGACAA  
 GAATTCGGAAAGCGCCCGTGCACAATACGTCTTGCAGAACAAGTCACAAGGCTAGTGCATGG  
 CGAGGAGGGCTTGAAGCAGCGAAGCGGATAACTGAGTGTGTTGTTAGTGAAGTCTTCCGCCCT  
 CTCGGAGGCAGATTTTGAAGCAACTTGCACAAGATGGGGTCCCATGGTGGAAATGGAGAAAGGAGC  
 CGATCTTATGCAAGCGCTTGTGACTCGGAGTTGCAGCCATCACGCGGACAAGCGCGAAAGACGAT  
 TGCTTCGAACGCTATTACAATCAATGGGGAGAAGCAATCGGACCCGAGTATTTTTTCAAGGAGGAG

GACAGACTCTTCGGCAGGTTACACTTTTAAGGCGTGGCAAGAAAACTATTGCCTAATATGTTGGA  
AGTAACTGTTGAGCTGAAAACTGACGAATTATG

>adk\_block1 (gBlock for constructing recoded adk gene for adk+tdk cassette)

atcgctttttcaaaaaattcgacacattttaaggggattttcgcaATGCGAATTATATTATTAGGAGCCCCGGTGCTGGTAA  
GGGCACGCAAGCACAATTTATTATGGAAAAGTACGGCATAACCACAGATATCAACGGGTGACATGCTT  
AGGGCCGCTGTTAAGTCGGGATCTGAATTAGGGAAGCAGGCTAAGGATATAATGGACGCGGGGAAG  
TTAGTTACTGATGAGCTAGTTATAGCCTTAGTAAAGGAAAGGATCGCACAAGAGGATTGTCCGGAACG  
GATTTCTCTTAGATGGATTTCCCCGGACTATACCCCAAGCCGATGCAATGAAGGAGGCCGGTATTAA  
CGTGGACTATGACTTGGATTTGATGTTCCAGATGAGTTAATAGTAGATAGGATAGTAGGAAGACGT  
GTACACGCACCCAGTGGCAGGGTCTACCATGTCAAGTTAACCCACCCAAGGTTGAGGGTAAGGAT  
GATGTCACTGGGAGGAGCTTACCACACGCAAGGACGACCAAGGAAACGGTGCGAAAGAGGCT  
TGATGACTATACCAAATGACTGCCCACTAATAGGGTATTATTCAAAGGAGGCTGAGGCAGGGAAC  
ACAAAGTATGCCAAGGTCGATGGGACAAAACCCGTAGCCGAGGTCAGAGCCGACTTGGAGAAGATT  
TTGGGTTAACTGTTGAGCTGAAAACTGACGAATTATGATAAACTCCAG

>adk.d4

atgCGTATCATTCTGCTTGGCGCTCCGGGCGCGGGGAAAGGGACTCAGGCTCAGTTCATCATGGAGA  
AATATGGTATTCCGCAAATCTCCACTGGCGATATGCTGCGTGCTGCGGTCAAATCTGGCTCCGAGCT  
GGGTAAACAAGCAAAAAGACATTATGGATGCTGGCAAATGGTCACCGACGAACTGGTGATCGCGCT  
GGTTAAAGAGCGCATTGCTCAGGAAGACTGCCGTAATGGTTTCCTGTTGGACGGCTTCCCGCGTAC  
CATTCCGCAGGCAGACGCGATGAAAGAAGCGGGCATCAATGCCGATTACGCTCTGGAATTCGACGT  
ACCGGACGAACTGATCGTTGACCGTATCGTCGGTCGCCCGGTTTCATGCGCCGTCTGGTCGTGTTTA  
TCACGTTAAATTCAATCCGCCGAAAAGTAGAAGGCAAAGACGACGTTACCGGTGAAGAAGTACTACC  
CGTAAAGATGATCAGGAAGAGACCGTACGTAAACGTCTGGTTGAATACCATCAGATGACTGCACCGT  
AGATCGGCTACGTTTCCAAAGAAGCAGAAGCGGGTAATACCAAATACCGGAAAGTTGACGGCACCA  
AGCCGGTTGCTGAAGTTCGCGCTGATCTGGAAAAATCCTCGGCtaa

>adk.d6

atgCGTATCGCTCTGGTCGGCGCTCCGGGCGCGGGGAAAGGGACTCAGGCTCAGTTCATCATGGAG  
AAATATGGTATTCCGCAAATCTCCACTGGCGATATGCTGCGTGCTGCGGTCAAATCTGGCTCCGAGC  
TGGGTAACAAGCAAAAAGACATTATGGATGCTGGCAAATGGTCACCGACGAACTGGTGATCGCGC  
TGGTTAAAGAGCGCATTGCTCAGGAAGACTGCCGTAATGGTTTCCTGTTGGACGGCTTCCCGCGTAC  
CATTCCGCAGGCAGACGCGATGAAAGAAGCGGGCATCAATGCCGATTACGTTCTGGAATTCGACGT  
ACCGGACGAACTGATCGTTGACCGTATCGTCGGTCGCCCGGTTTCATGCGCCGTCTGGTCGTGTTTA  
TCACGTTAAATTCAATCCGCCGAAAAGTAGAAGGCAAAGACGACGTTACCGGTGAAGAAGTACTACC  
CGTAAAGATGATCAGGAAGAGACCGTACGTAAACGTCTGGTTGAATACCATCAGATGACAGCACCGT  
AGATCGGCTACGTTTCCAAAGAAGCAGAAGCGGGTAATATTAAATACCGGAAAGTTGACGGCACCAA  
GCCGGTTGCTGAAGTTCGCGCTGATCTGGAAAAATCCTCGGCtaa

>tyrS.d6

atgGCAAGCAGTAACTTGATTAACAATTGCAAGAGCGGGGGCTGGTAGCCAGGTGACGGACGAGG  
AAGCGTTAGCAGAGCGACTGGCGCAAGGCCGATCGCGCTCTATTGCGGCTTCGATCCTACCGCTG  
ACAGCTTGCATCTGGGGCATTAGTTCCATTGTTATGCCTGAAACGCTTCCAGCAGGCGGGCCACAA  
GCCGGTTGCGCTGGTAGGCGGCGGACGGGTCTGATTGGCGACCCGAGCTTCAAAGCTGCCGAGC  
GTAAGCTGAACACCGAAGAACTGTTCAAGAGTGGGTGGACAAAATCCGTAAGCAGGTTGCCCGT  
TCCTCGATTTGACTGTGGAGAAAACCTCTGCTATCGCGGCGAACAACCTATGACTGGTTCCGGCAATAT  
GAATGTGCTGACCTTCTGCGCGATATTGGCAAACACTTCTCCGTTAACCAGATGATCAACAAAGAA  
GCGGTTAAGCAGCGTCTCAACCGTGAAGATCAGGGGATTTTCGTTCACTGAGTTTTCTACAACCTGT  
TGCAGGGTTATGACTTCGCCTGTCTGAACAAACAGTACGGTGTGGTGCTGCAAATTGGTGGTTCTGA  
CCAGTGGGGTAAACATCACTTCTGGTATCGACCTGACCCGCTGCTGTCATCAGAATCAGGTGTTTGGC  
CTGACCGTTCCGCTGATCACTAAAGCAGATGGCACCAAAAGCCGGTAAAACCTGAAGGCGGGCGAGTC  
TGGTTGGATCCGAAGAAAACAGCCCGTACAAATCTACCAGTTCTTCATCAACGTAAGCGGATGCCG  
ACGTTTACCGCTTCTGAAGTTCAGTACCTTTATGAGCATTGAAGAGATCAACGCCCTGGAAGAAGA  
AGATAAAAACAGCGGTAAAGCACCGCGCGCCAGTATGATAGCGGAGCAGGCCACTCGTCTGGT  
TCACGGTGAAGAAGGTTTACAGGCGGCAAAACGTATTACCGAATGCCTGTTCAAGCGGTTCTTTGAGT



CGCTGAGTGAAGCGGACTTCGAACAGCTGGCGCAGGACGGCGTACCGATGGTTGAGATGGAAAA  
GGGCGCAGACCTGATGCAGGCACTGGTTCGATTCTGAACTGCAACCTTCCCCTGGTCAGGCACGTAA  
AACTATCGCCTCCAATGCCATCACCATTAACGGTGAAAAACAGTCCGATCCTGAATACTTCTTTAAAG  
AAGAAGATCGTCTGTTTGGTTCGTTTTACCTTACTGCGTCGCGGTAAAAAGAATTACTGTCTGATTTGC  
TGAAAAtaa

>tyrS.d7

atgGCAAGCAGTAACTTGATTAACAATTGCAAGAGCGGGGGCTGGTAGCCCAGGTGACGGACGAGG  
AAGCGTTAGCAGAGCGACTGGCGCAAGGCCCGATCGCGCTCTATTGCGGCTTCGATCCTACCGCTG  
ACAGCTTGCATGCAAGGGCATTGTTCCATTGTTATGCCTGAAACGCTTCCAGCAGGCGGGCCACAA  
GCCGGTTGCGCTGGTAGGCGGCGCGACGGGTCTGATTGGCGACCCGAGCTTCAAAGCTGCCGAGC  
GTAAGCTGAACACCGAAGAAACTGTTCCAGGAGTGGTGGACAAAATCCGTAAGCAGGTTGCCCCGT  
TCCTCGATTTTCGACTGTGGAGAAAACCTGCTATCGCGGCGAACAACACTATGACTGTTTCGGCAATAT  
GAATGTGCTGACCTTCTGCGCGATATTGGCAAACACTTCTCCGTTAACAGATGATCAACAAAGAA  
GCGGTTAAGCAGCGTCTCAACCGTGAAGATCAGGGGATTTTCGTTCACTGAGTTTTCTACAACCTGT  
TGCAGGGTTATGACTTCGCCTGTCTGAACAAACAGTACGGTGTGGTGTGCTGCAAATTGGTGGTTCTGA  
CCAGTGGGGTAACATCACTTCTGGTATCGACCTGACCCGTCGCTGTCATCAGAATCAGGTGTTTGGC  
CTGACCGTTCCGCTGATCACTAAAGCAGATGGCACCAAAAGCCGGTAAAACCTGAAGGCGGCGCAGTC  
TGGTTGGATCCGAAGAAAACCAGCCCGTACAAATTCTACCAGTTCGCTATCAACGCTGCGGATGCCG  
ACGTTTACCGCTGGCTGAAGTTCACCGACCTTTATGAGCATTGAAGAGATCAACGCCCTGGAAGAAGA  
AGATAAAAACAGCGGTAAAGCACCGCGCGCCAGTATGATAGCGGAGCAGGTAACCTCGTCTGGT  
TCACGGTGAAGAAGGTTTACAGGCGGCAAAACGTATTACCGAATGCCTGTTTCAGCGGTTCTTTGAGT  
GCGCTGAGTGAAGCGGACTTCGAACAGCTGGCGCAGGACGGCGTACCGATGGTTGAGATGGAAAA  
GGGCGCAGACCTGATGCAGGCACTGGTTCGATTCTGAACTGCAACCTTCCCCTGGTCAGGCACGTAA  
AACTATCGCCTCCAATGCCATCACCATTAACGGTGAAAAACAGTCCGATCCTGAATACTTCTTTAAAG  
AAGAAGATCGTCTGTTTGGTTCGTTTTACCTTACTGCGTCGCGGTAAAAAGAATTACTGTCTGATTTGC  
TGAAAAtaa

>tyrS.d8

atgGCAAGCAGTAACTTGATTAACAATTGCAAGAGCGGGGGCTGGTAGCCCAGGTGACGGACGAGG  
AAGCGTTAGCAGAGCGACTGGCGCAAGGCCCGATCGCGCTCTATTGCGGCTTCGATCCTACCGCTG  
ACAGCTTGCATGCAAGGGCATTGTTCCATTGTTATGCCTGAAACGCTTCCAGCAGGCGGGCCACAA  
GCCGGTTGCGCTGGTAGGCGGCGCGACGGGTCTGATTGGCGACCCGAGCTTCAAAGCTGCCGAGC  
GTAAGCTGAACACCGAAGAAACTGTTCCAGGAGTGGTGGACAAAATCCGTAAGCAGGTTGCCCCGT  
TCCTCGATTTTCGACTGTGGAGAAAACCTGCTATCGCGGCGAACAACACTATGACTGTTTCGGCAATAT  
GAATGTGCTGACCTTCTGCGCGATATTGGCAAACACTTCTCCGTTAACAGATGATCAACAAAGAA  
GCGGTTAAGCAGCGTCTCAACCGTGAAGATCAGGGGATTTTCGTTCACTGAGTTTTCTACAACCTGT  
TGCAGGGTTATGACTTCGCCTGTCTGAACAAACAGTACGGTGTGGTGTGCTGCAAATTGGTGGTTCTGA  
CCAGTGGGGTAACATCACTTCTGGTATCGACCTGACCCGTCGCTGTCATCAGAATCAGGTGTTTGGC  
CTGACCGTTCCGCTGATCACTAAAGCAGATGGCACCAAAAGCCGGTAAAACCTGAAGGCGGCGCAGTC  
TGGTTGGATCCGAAGAAAACCAGCCCGTACAAATTCTACCAGTTCGCTATCAACGCTGCGGATGCCG  
ACGTTTACCGCTGGCTGAAGTTCACCGACCTTTATGAGCATTGAAGAGATCAACGCCCTGGAAGAAGA  
AGATAAAAACAGCGGTAAAGCACCGCGCGCCAGTATGATAGCGGAGCAGGCAACTCGTCTGGT  
TCACGGTGAAGAAGGTTTACAGGCGGCAAAACGTATTACCGAATGCCTGTTTCAGCGGTTCTTTGAGT  
GCGCTGAGTGAAGCGGACTTCGAACAGCTGGCGCAGGACGGCGTACCGATGGTTGAGATGGAAAA  
GGGCGCAGACCTGATGCAGGCACTGGTTCGATTCTGAACTGCAACCTTCCCCTGGTCAGGCACGTAA  
AACTATCGCCTCCAATGCCATCACCATTAACGGTGAAAAACAGTCCGATCCTGAATACTTCTTTAAAG  
AAGAAGATCGTCTGTTTGGTTCGTTTTACCTTACTGCGTCGCGGTAAAAAGAATTACTGTCTGATTTGC  
TGAAAAtaa

>metG.d3

atgACTCAAGTCGCGAAGAAAATTCTGGTGACGTGCGCACTGCCGTACGCTAACGGCTCAATCCACCT  
CGGCCATATGCTGGAGCACATCCAGGCTGATGTCTGGGTCCGTTACCAGCGAATGCGCGGCCACGA  
GGTCAACTTCATCTGCGCCGACGATGCCACGGTACACCGATCATGCTGAAAGCTCAGCAGCTTGG  
TATCACCCCGGAGCAGATGATTGGCGAAATGAGTCAGGAGCATCAGACTGATTTTCGAGGCTTTAAC

ATCAGCTATGACAACCTATCACTCGACGCACAGCGAAGAGAACCGCCAGTTGTCAGAACTTATCTACT  
CTCGCCTGAAAGAAAACGGTTTTATTA AAAACCGCACCATCTCTCAGCTGTACGATCCGAAAAAGG  
CATGTTCTGCGGACCGTTTTGTGAAAGGCACCTGCCGAAATGTAAATCCCCGGATCAATACGGC  
GATAACTGCGAAGTCTGCGGCGGACCTACAGCCGACTGAACTGATCGAGCCGAAATCGGTGGTT  
TCTGGCGCTACGCCGGTAATGCGTGATTCTGAACACTTCTTCTTTGATCTGCCCTCTTTTCAGCGAAAT  
GTTGCAGGCATGGACCCGCAGCGGTGCGTTGCAGGAGCAGGTGGCAAATAAAATGCAGGAGTGGT  
TTGAATCTGGCCTGCAACAGTGGGATATCTCCCGCGACGCCCTTACTTCGGTTTTGAAATCCGAA  
CGCGCCGGGCAAATATTTCTACGTCTGGCTGGACGCACCGATTGGCTACATGGGTTCTTTCAAGAA  
CTGTGCGACAAGCGCGGCGACAGCGTAAGCTTCGATGAATACTGGAAGAAAGACTCCACCGCCGAG  
CTGTACCACTTCATCGGTAAAGATATTGTTTACTTCCACAGCCTGTTCTGGCCTGCCATGCTGGAAG  
GCAGCAACTTCCGCAAGCCGTCCAACCTGTTTGTTCATGGCTATGTGACGGTGAACGGCGCAAAGA  
TGTCCAAGTCTCGCGGCACCTTTATTAAGCCAGCACCTGGCTGAATCATTGACGCAGACAGCCT  
GCGTTACTACTACACTGCGAAACTCTTTCGCGCATTGATGATATCGATCTCAACCTGGAAGATTTCC  
TTCAGCGTGTGAATGCCGATATCGTTAACAAAAGTGGTTAACCTGGCCTCCCGTAATGCGGGCTTTAT  
CAACAAGCGTTTTGACGGCGTGCTGGCAAGCGAACTGGCTGACCCGCAGTTGTACAAAACCTTCAC  
TGATGCCGCTGAAGTGATTGGTGAAGCGTGGGAAAGCCGTGAATTTGGTAAAGCCGTGCGCGAAAT  
CATGGCGCTGGCTGATCTGGCTAACCGCTATGTCGATGAACAGGCTCCGTGGGTGGTGGCGAAACA  
GGAAGGCCGCGATGCCGACCTGCAGGCAATTTGCTCAATGGGCATCAACCTGTTCCGCGTGCTGGC  
CACTTACCTGAAGCCGGTACTGCCGAAACTGACCGAGCGTGCAGAAGCAAGGATACGGAACCT  
GACCTGGGATGGTATCCAGCAACCGCTGCTGGGCCACAAAGTGAATCCGTTCAAGGCGCTGTATAA  
CCGCATCGATATGAGGCAGGTTGAAGCACTGGTGGAAAGCCTCTAAAGAAGAAGTAAAAGCCGCTGC  
CGCGCCGGTAACTGGCCCGCTGGCAGATGATCCGATTGAGGAAACCATCACCTTTGACGACTTCGC  
TAAAGTTGACCTGCGCGTGGCGCTGATTGAAAACGCAGAGTTTGTGAAAGTTCTGACAAAACCTGCTG  
CGCCTGACGCTGGATCTCGGCGGTGAAAAACGCAATGTCTTCTCCGGTATTGTTCTGCTTACCCGG  
ATCCGCAGGCACTGATTGGTCGTACACCATTATGGTGGCTAACCTGGCACACGTA AAAATGCGCTT  
CGGTATCTCTGAAGGCATGGTGTGCTGCCGGTCTGGCGGGAAAGATATTTTCTGCTAAGCCC  
GGATGCCGGTGCTAAACCGGGTCATCAGGTGAAAtaa

>pgk.d4

atgTCTGTAATTAAGATGACCGATCTGGATCTTGCTGGGAAACGTGATTTATCCGTGCGGATCTGAAC  
GTACCAGTAAAAGACGGGAAAGTAACCAGCGACGCGCGTATCCGTGCTTCTCTGCCGACCATCGAA  
CTGGCCCTGAAACAAGGCGCAAAGTGTGTAACCTCCACCTGGGTCGTCTACCGAAGGCGAG  
TACAACGAAGAATTCTCTCTGCTGCCGGTTGTTAACTACCTGAAAGACAAACTGTCTAACCCGGTTCCG  
TCTGGTTAAAGATTACCTCGACGGCGTTGACGTTGCTGAAGGTGAACTGGTTGTTCTGGAAAACGTT  
CGCTTCAACAAAGGCGAGAAGAAAGACGACGAAACCCTGTCCAAAAAATACGCTGCACTGTGTGAC  
GTGTTTCGTAATGGACGCATTCGGTACTGCTCACCAGCGCGCAGGCTTCTACTCACGGTATCGGTAAAT  
TCGCTGACGTTGCGTGCGCAGGCCCGCTGCTGGCAGCTGAACTGGACGCGCTGGGTAAAGCACTG  
AAAGAACCTGCTCGCCCGATGGCTGCTGGC GTTGGTGGTTCTAAAGTATCTACCAAACCTGACCGTTC  
TGGACTCCCTGTCTAAAATCGCTGACCAGCTGGCGTTGGTGGTGGTATCGCTAACACCTTTATCGC  
GGCACAAGGCCACGATGTGGGTAAATCCCTGTACGAAGCTGACCTGGTTGACGAAGCTAAACGCTCT  
GCTGACCACCTGCAACATCCCGTTCCGTCTGATGTTCCGCTAGCAACCGAGTTCTCTGAAACTGCA  
CCGGCTACCCTGAAATCTGTTAACGATGTGAAAGCTGACGAGCAGATCCTGGATATCGGTGATGCTT  
CCGCTCAGGAACTGGCTGAAATCTAGAGAATGCGAAAACCTTCTGTGGAACGGTCCGGTCCGGCG  
TGTTTCAATTCCCGAACTTCCGCAAAGGTAAGTAAATCGTGGCTAACGCTATCGCAGACAGCGAAGC  
GTTCTCCATCGCTGGCGGCGGCGACACTCTGGCAGCAATCGACCTGTTCCGGCATTGCTGACAAAAT  
CTCCTACATCTCCACTGGCGGCGGCGCATTCTCGAATTCGTGGAAGGTAAAGTACTGCCTGCAGTA  
GCGATGCTCGAAGAGCGCGCTAAGAAgtaa

>alaS.d5

atgAGCAAGAGCACCGCTGAGATCCGTCAGGCGTTTCTCGACTTTTTCCATAGTAAGGGACATCAGGT  
AGTTGCCAGCAGCTCCCTGGTACCCCATACGACCCAACCTTTGTTGTTTACCAACGCCGGGATGAAC  
CAGTTCAAGGATGTGTTCTTGGGCTCGACAAGCGTAATTATCCCGCGCTACCACTTCCCAAGCGT

CGGTGCGTGCGGGTGGTAAACACAACGACCTGGAAAACGTCGGTTACACCGCGCGTCACCATACCG  
 CGTTTCGAAATGCTGGGCAACTTCAGCTTCGGCGACTATTTCAAACACGATGCCATTCAGTTTGCATG  
 GAACTGCTGACCAGCGAAAAATGGTTTGCCTGCCGAAAGAGCGTCTGTGGGTACCGTCTATGA  
 AAGCGACGACGAAGCCTACGAAATCTGGGAAAAAGAAGTAGGGATCCCGCGCGAACGTATTATTCG  
 CATCGGCGATAACAAAGGTGCGCCATACGCATCTGACAACTTCTGGCAGATGGGTGACACTGGTCC  
 GTGCGGCCCGTGACCGAAATCTTCTACGATCACGGCGACCACATTTGGGGGGGCCCTCCGGGAA  
 GCCCGGAAGAAGACGGCGACCGCTACATTGAGATCTGGAACATCGTCTTCATGCAGTTCAACCGCC  
 AGGCCGATGGCACGATGGAACCGCTGCCGAAGCCGTCTGTAGATACCGGTATGGGTCTGGAGCGT  
 ATTGCTGCGGTGCTGCAACACGTTAACTCTAACTATGACATCGACCTGTTCCGCACG TAGATCCAGG  
 CGGTAGCGAAAGTCACTGGCGCAACCGATCTGAGCAATAAATCGCTGCGCGTAATCGCTGACCACA  
 TTGCACTTTGTGCGCCA CTGATCGCGGATGGCGTAATGCCGTCCAATGAAAACCGTGGTTATGTACT  
 GCGTCGTATCATTGTCGCGCAGTGCCTCACGGTAATATGCTCGGCGCGAAAGAAACCTTCTTTAC  
 AAAGTGGTTCGCGCTGATCGACGTTATGGCTCTGCGGGTGAAGACCTGAAACGCCAGCAGCGG  
 CAGTTTGAGCAGGTGCTGAAGACTGAAGAAGAGCAGTTTGTCTGTAATCTGGAGCGCGGTCTGGCG  
 TTGCTGGATGAAGAGCTGGCAAACTTTCTGGTGATACGCTGGATGGTGAAGTGTCTTCCGCTCTGT  
 ACGACACCTATGGCTTCCCGGTTGACCTGACGGCTGATGTTTGTCTGAGCGCAACATCAAAGTTGA  
 CGAAGCTGGTTTTGAAGCTGCAATGGAAGAGCAGCGTCGTCGCGCGCGCAAGCCAGCGGCTTTG  
 GTGCCGATTACAACGCAATGATCCGTGTTGACAGTGCATCTGAATTTAAAGGCTATGACCATCTGGA  
 ACTGAACGGCAAAGTGACTGCGCTGTTTGTGATGGTAAAGCGGTTGATGCCATCAATGCAGGCCA  
 GGAAGCTGTGGTCGTGCTGGATCAAACGCCATTCTATGCGGAATCCGGCGGTGAGTTGGCGATAA  
 AGGCCAACTGAAAGGCGCTAACTTCTCCTTTGCGGTGGAAGATACGCAGAAATACGGCCAGGCGAT  
 TGGTCACATCGGTAACTTGTGCGGGTCTCTGAAAGTGGGCGACGCGGTGCAGGCTGATGTTGA  
 TGAGGCTCGTCGCGCCCGTATTCGTCTGAATCACTCCGCAACGCACCTGATGCACGCTGCGCTGCG  
 CCAGGTTCTGGGTACTCATGTATCGCAGAAAGGTTCACTGGTTAACGACAAGGTGCTGCGCTTCGAC  
 TTCTCACACAACGAAGCGATGAAACCAGAAGAGATTCGTGCGGTGCAAGACCTGGTGAACACACAG  
 ATTCGTGCGAATTTGCCGATCGAAACCAACATCATGGATCTCGAAGCGGCGAAAGCGAAAGGTGCG  
 ATGGCGCTGTTCCGGCGAGAAGTATGATGAGCGCGTACGCGTGTGAGCATGGGCGATTTCTCTACC  
 GAGTTGTGTGGCGGTA CTACGCCAGCCGCACTGGTGTATTTGGTCTGTTCCGCATCATCTCTGAAT  
 CGGGTA CTGCTGCAGGCGTTCGTCTGATCGAAGCGGTAACCGGAGAAGGTGCTATCGCCACCGTTG  
 ATGCAGACAGCGATCGCTTAAGCGAAGTTCGCGCATCTGCTGAAAGGCGATAGCAATAATCTGGCTG  
 ATAAAGTGCCTCAGTACTGGAACGTACGCGTCAGCTGGAAAAAGAGTTACAACAGCTTAAAGAACA  
 AGCTGCCGCACAGGAGAGCGCAAATCTTTCCAGTAAGGCAATTGATGTTAATGGTGTAAAGCTGTTG  
 GTTAGCGAGCTTAGCGGTGTTGAGCCGAAATGTTGCGTACCATGGTTGACGATTTAAAAAATCAGC  
 TGGGGTGCACAATTATCGTGTGCAACGGTAGTCGAAGGTAAGGTTTCTCTGATTGCAGGCGTATC  
 TAAGGACGTCACAGATCGTGTGAAAGCAGGGGAAGTATTGGTATGGTCGCTCAGCAGGTGGGCGG  
 CAAGGGTGGTGGACGTCCTGACATGGCGCAAGCCGGTGGTACGGATGCTGCGGCCTTACCTGCAG  
 CGTTAGCCAGTGTGAAAGGCTGGGTACGCGCGAAATTGCAAtaa

>alaS.d5.startUAG

atgTAGAGCAAGAGCACCGCTGAGATCCGTCAGGCGTTTCTCGACTTTTTCCATAGTAAGGGACATCA  
 GGATGTTGCCAGCAGCTCCCTGGTACCCATAACGACCCAACCTTTGTTGTTTACCAACGCCGGGATG  
 AACCAGTTCAAGGATGTGTTTCTTGGGCTCGACAAGCGTAATTATTCCCGCGCTACCACTTCCCAAG  
 CGTGCCTGCGTGGGGTGGTAAACACAACGACCTGGAAAACGTCGGTTACACCGCGCGTCACCATA  
 CC GCGTTTCGAAATGCTGGGCAACTTCAGCTTCGGCGACTATTTCAAACACGATGCCATTCAGTTTGC  
 ATGGGAACTGCTGACCAGCGAAAAATGGTTTGCCTGCCGAAAGAGCGTCTGTGGGTACCGTCTA  
 TGAAAGCGACGACGAAGCCTACGAAATCTGGGAAAAAGAAGTAGGGATCCCGCGCGAACGTATTAT  
 TCGCATCGGCGATAACAAAGGTGCGCCATACGCATCTGACAACTTCTGGCAGATGGGTGACACTGG  
 TCCGTGCGGCCCGTGACCGAAATCTTCTACGATCACGGCGACCACATTTGGGGGGGCCCTCCGG  
 GAAGCCCAGGAAGAAGACGGCGACCGCTACATTGAGATCTGGAACATCGTCTTCATGCAGTTCAACC  
 GCCAGGCCGATGGCACGATGGAACCGCTGCCGAAGCCGTCTGTAGATACCGGTATGGGTCTGGAG  
 CGTATTGCTGCGGTGCTGCAACACGTTAACTCTAACTATGACATCGACCTGTTCCGCACG TAGATCC  
 AGGCCGTAGCGAAAGTCACTGGCGCAACCGATCTGAGCAATAAATCGCTGCGCGTAATCGCTGACC  
 ACATTGCACTTTGTGCGCCA CTGATCGCGGATGGCGTAATGCCGTCCAATGAAAACCGTGGTTATGT  
 ACTGCGTCGTATCATTGTCGCGCAGTGCCTCACGGTAATATGCTCGGCGCGAAAGAAACCTTCTTC  
 TACAACTGGTTGGTCCGCTGATCGACGTTATGGGCTCTGCGGGTGAAGACCTGAAACGCCAGCAG  
 GCGCAGGTTGAGCAGGTGCTGAAGACTGAAGAAGAGCAGTTTGTCTGTAATCTGGAGCGCGGTCTG

CGTGTGCTGGATGAAGAGCTGGCAAACTTTCTGGTGATACGCTGGATGGTGAAACTGCTTTCCGTC  
TGTACGACACCTATGGCTTCCCGGTTGACCTGACGGCTGATGTTTGTCTGTGAGCGCAACATCAAAGT  
TGACGAAGCTGGTTTTGAAGCTGCAATGGAAGAGCAGCGTCGTCGCGCGCGCAAGCCAGCGGCT  
TTGGTGCCGATTACAACGCAATGATCCGTGTTGACAGTGCATCTGAATTTAAAGGCTATGACCATCTG  
GAACTGAACGGCAAAGTGAAGTGCAGCTGTTTGTGATGGTAAAGCGGTTGATGCCATCAATGCAGGC  
CAGGAAGCTGTGGTCTGTGGATCAAACGCCATTCTATGCGGAATCCGGCGGTCAGGTTGGCGAT  
AAAGGCCAACTGAAAGGCGCTAACTTCTCCTTTGCGGTGGAAGATACGCAGAAATACGGCCAGGCG  
ATTGGTACATCGGTAACTTGTGCGGGTCTCTGAAAGTGGGCGACGCGGTGCAGGCTGATGTT  
GATGAGGCTCGTCGCGCCCGTATTCGTCTGAATCACTCCGCAACGCACCTGATGCACGCTGCGCTG  
CGCCAGGTTCTGGTACTCATGTATCGCAGAAAGGTTCACTGGTTAACGACAAGGTGCTGCGCTTC  
GACTTCTCACACAACGAAGCGATGAAACCAGAAGAGATTCTGTCGGTCAAGACCTGGTGAACACA  
CAGATTCTGCGCAATTTGCCGATCGAAACCAACATCATGGATCTCGAAGCGGCGAAAGCGAAAGGT  
GCGATGGCGCTGTTCCGGCGAGAAGTATGATGAGCGCGTACGCGTGTGAGCTGAGCAGGATTCTCT  
ACCGAGTTGTGTGGCGGTAAGTACTCACGCCAGCCGCACTGGTATATTGGTCTGTTCCGCATCATCTCTG  
AATCGGGTACTGCTGCAGGCGTTTCGTCTATCGAAGCGGTAACCGGAGAAGGTGCTATCGCCACCG  
TTCATGCAGACAGCGATCGCTTAAGCGAAGTCGCGCATCTGCTGAAAGGCGATAGCAATAATCTGGC  
TGATAAAGTGCAGCTCAGTACTGGAACGTACGCGTCAGCTGGAAAAAGAGTTACAACAGCTTAAAGAA  
CAAGCTGCCGCACAGGAGAGCGCAAATCTTTCCAGTAAGGCAATTGATGTTAATGGTGTAAAGCTGT  
TGGTTAGCGAGCTTAGCGGTGTTGAGCCGAAAATGTTGCGTACCATGGTTGACGATTTAAAAAATCA  
GCTGGGGTCGACAATTATCGTGTGGCAACGGTAGTCGAAGGTAAGGTTTCTCTGATTGCAGGCGT  
ATCTAAGGACGTACAGATCGTGTAAAGCAGGGGAACTGATTGGTATGGTCGCTCAGCAGGTGGG  
CGGCAAGGGTGGTGGACGTCCTGACATGGCGCAAGCCGGTGGTACGGATGCTGCGGCCTTACCTG  
CAGCGTTAGCCAGTGTGAAAGGCTGGGTGAGCGCGAAATTGCAAtaa

>holB.d1

atgAGATGGTATCCATGGTTACGACCTGATTTTCGAAAACTGGTAGCCAGCTATCAGGCCGGAAGAGG  
TCACCATGCGCTACTCATTACAGGCGTTACCGGGCATGGGCGATGATGCTTTAATCTACGCCCTGAGC  
CGTATTTACTCTGCCAACACCAGGGCCACAAAAGTTGCGGTCACTGTCTGGATGTCAGTTGA  
TGCAGGCTGGCACGCATCCCGATTACTACACCTGGCTCCCGAAAAAGGAAAAAATACGCTGGGCG  
TTGATGCGGTACGTGAGGTCACCGAAAAGCTGAATGAGCACGCACGCTTAGGTGGTGGCAAAGTGC  
TTTGGGTAACCGATGCTGCCTTACTAACCAGCGCCGCGGCTAACGCATTGCTGAAAACGCTTGAAGA  
GCCACCAGCAGAACTTGGTTTTCTGGCTACCCGCGAGCCTGAACGTTTACTGGCAACATTACGT  
AGTCGTTGTGCGTTACATTACCTTGCGCCGCCGCGGAACAGTACGCCGTGACCTGGCTTTCACGC  
GAAGTGACAATGTACAGGATGCATTACTTGCCTAGTTGCGCTTAAGCGCCGGTTCGCCTGGCGCG  
GCATGGCGTTGTTTCAGGGAGATAACTGGCAGGCTCGTGAACATTGTGTCAGGCGTTGGCATATA  
GCGTGCCATCGGCGCATGGTATTCTGCTGCTGACGCGCCCTTAATCATGAACAAGCTCCGGCGCTT  
TACACTGGCTGGCAACGTTGCTGATGGATGCGCTAAAACGCCATCATGGTACTGCGCAGGTGACCA  
ATGTTGATGTGCCGGGCTGGTGCCTGAACTGGCAAACCATCTTTCTCCCTCGCGCCTGCAGGCTA  
TACTGGGGGATGTTTGCCACATTCTGTAACAGTTAATGTCTGTTACAGGCATCAACCGCGAGCTTCT  
CATCACCGATCTTTACTGCGTATTGAGCATTACCTGCAACCGGGCGTTGTGCTACCGGTTCTCAT  
CTTtaa

>bipARS.d7

atgGACGAATTCGAAATGATCAAACGTAACACCTCTGAAATCATCTCTGAAGAAGAAGTGCCTGAAGTT  
CTGAAAAAGACGAAAAATCTGCGCACATCGGTTTTCGAACCGTCTGGTAAAATCCACCTGGGTCCT  
ACCTGCAGATCAAAAAATGATCGACCTGCAGAACCGGGTTTCGACATCATCATCCACCTGGCGGA  
CCTGCACGCTACCTGAACCAGAAAGGTGAACTGGACGAAATCCGTAATAATCGGTGACTACAACAAA  
AAAGTTTTTCGAAGCGATGGGTCTGAAAGCGAAATACGTTTACGTTCTGAATGGATGCTGGACAAAG  
ACTACACCCTGAACGTTTACCGTCTGGCGCTGAAAACCACCCTGAAACGTGCGCGTCTGTTCTATGGA  
ACTGATCGCGCGTGAAGACGAAAACCCGAAAGTTGCGGAAGTTATCTACCCGATCATGCAGGTTAAC  
GGTATCCACTACAAAGGTGTTGACGTTGCGGTTGGTGGTATGGAACAGCGTAAAATCCACATGCTGG  
CGCGTGAAGTCTGCCGAAAAAGTTGTTTGCATCCACAACCCGGTCTGACCGGTCTGGACGGTG  
AAGGTAATAATGCTTCTTCTAAAGGTAATTCATCGCGGTTGACGACTCTCCGGAAGAAATCCGTCG  
GAAAATCAAAAAAGCGTACTGCCCGGCGGGTGTGTTGTAAGGTAACCCGACAGCTGAAATCGGTAA  
ATACTTCTGGAATACCCGCTGACCATCAAACGTCCGGAATAATTCGGTGGTGGTACCTGACCGTTAAC

TCTTACGAAGAA**GG**GAATCTCTGTTCAAAAACAAAGAACTGCACCCGATG**CGT****GCG**AAAAACGCG**T**  
**AG**GCGGAAGAACTGATCAAAATCCTGGAACCGATCCGTAAACGTCTGtaa

>adk(recode)-tdk

atcgcttttcaaaaaattcgacacattttaaggggattttcgcaATGCGAATTATATTATTAGGAGCCCCCGGTGCTGGTAA  
GGGCACGCAAGCACAATTTATTATGGAAGGACGCGCATACCACAGATATCAACGGGTGACATGCTT  
AGGGCCGCTGTTAAGTCGGGATCTGAATTAGGGAAGCAGGCTAAGGATATAATGGACGCGGGGAAG  
TTAGTTACTGATGAGCTAGTTATAGCCTTAGTAAAGGAAAGGATCGCACAAAGAGGATTGTCCGGAACG  
GATTTCTCTTAGATGGATTTCCCCGGACTATACCCCAAGCCGATGCAATGAAGGAGGCCGGTATTAA  
CGTGGACTATGTACTTGAGTTTGATGTTCCAGATGAGTTAATAGTAGATAGGATAGTAGGAAGACGT  
GTACACGCACCCAGTGGCAGGGTCTACCATGTCAAGTTAACCCACCCAAGGTTGAGGGTAAGGAT  
GATGTCACTGGGAGGAGCTTACCACACGCAAGGACGCCAAGGAAACGGTGCAGAAAGAGGCT  
TGTAGAGTATACCAAATGACTGCCCCACTAATAGGGTATTATTCAAAGGAGGCTGAGGCAGGGAAC  
ACAAAGTATGCCAAGTTCGATGGGACAAAACCCGTAGCCGAGGTCAGAGCCGACTTGGAGAAGATT  
TTGGGTTAACTGTTGAGCTGAAAACTGACGAATTATGATAAACTCCAGCCAACCTTTATTTTCATATCAT  
TGAGGGCCTGTGGCTGatggcacagctatatttactacttccgcaatgaatgcgggtaagtctacagcattgttgaatcttcatacaatta  
ccaggaacgcggcatgcgactgtcgatatacggcagaaattgatgatcgcttgggtgcccggaaagtccagttcgctataggtttgcatcgctg  
caaaattattaacaaaattcatcattttgatgagattcggtcggaacatgaacagcaggcaattcattgctactggtgatgaatgccagttttta  
ccagacaacaagatatgaattatcgagggttgcgatcaactcgatatacccgtactttgtatggtttacgtaccgattttcgaggtaattttattgg  
cagccaatactactggcatggtccgacaaaactggtgaattaaaaaccatctgttttggccgtaaagcaagcatggtgctgctgcttcatcaagc  
aggcagacctataacgaaggtgagcaggtgtaattggtgtaataacgatacgtttctgtatgcccgtaaactataaagaggcgttacaagtc  
gactcattaacggctattcaggaaggcatgccacgattaaTAAGAATTTCTTTACTGACAGGGTGAGCAGGGCACTTT  
TATCCTGTCAGTTCGTTTTACGCACTTCTTCCGGGCTATATACCTTCTCGGCAGttcgaagcgcgcacgga  
cagtcccctcgccccctggggagagggttag

>tyrS(recode)-tdk

gcccgatcgctctattgcggttcgatcctaccgctgacagcttgcATGGGACACCTGGTCCCGCTTTTGTGTCTCAAG  
AGGTTTCAACAAGCTGGTCATAAACCAGTCGCTCTAGTCGGTGGAGCTACCGGGCTAATCGGGGAT  
CCCTCCTTTAAGGCAGCTGAACGCAAACCTAATACAGAGGAGACGGTGCAAGAATGGGTGCGATAAGA  
TACGAAAACAAGTAGCGCCATTTTTGGACTTTGATTGCGGCGAGAATTCGGCAATAGCCGCTAATAA  
TTACGATTGGTTTGGAAACATGAACGTACTTACTTTTTGCGGGACATAGGGAAGCATTTTAGCGTGA  
ATCAATGATAAATAAGGAGGCCGTCAAACAAAGACTGAATCGCGAGGACCAAGGTATCAGCTTTAC  
AGAATTCTCGTATAATCTTTTACAAGGGTACGATTTTGCATGCCTTAATAAGCAATATGGAGTCGTCCT  
ACAGATAGGAGGAAGTGAATGGGGAATATTACGTCGGGAATAGATTTGACACGCCGCTCCAC  
CAAAACCAAGTCTTCGGTCTCACGGTGCCTCTTATTACGAAGGCTGACGGGACGAAGTTCGGCAAG  
ACCGAGGGTGGTCCCGTGTGGCTAGACCCAAAAAAGACTTTCGCTTATAAGTTTTATCAATTTTGA  
TTAATACGGCCGACGCTGATGTCTATCGTTTTCTCAAATTTTTACTTTTCATGTCCATCGAGGAAATTA  
ATGCGCTCGAGGAGGAGGACAAGAATTCCGGTAAAGGCGCCCGTGCACAATACGTCCTTGCAGAAC  
AAGTACAAGGCTAGTGCATGGCGAGGAGGCTTGCAAGCAGCGAAGCGGATAACTGAGTGTGTTGT  
TTAGTGGAAGTCTTTCGCCCTCTCGGAGGCAGATTTTGGCAACTTGCACAAGATGGGGTTCCCAT  
GGTGGAAATGGAGAAAGGAGCCGATCTTATGCAAGCGCTTGTGACTCGGAGTTGCAGCCATCACG  
CGGACAAGCGGAAAGACGATTGCTTCAACGCTATTACAATCAATGGGGAGAAGCAATCGGACCC  
GGAGTATTTTTTCAAGGAGGAGGACAGACTCTTCGGCAGGTTACACTTTTAAAGGCGTGGCAAGAAA  
AACTATTGCCTAATATGTTGGAAGTAACTGTTGAGCTGAAAACTGACGAATTATGATAAACTCCAGC  
CAACTTTATTTTCATATCATTGAGGGCCTGTGGCTGatggcacagctatatttactacttccgcaatgaatgcgggtaagtcta  
cagcattgttgaatcttcatacaattaccaggaacgcggcatgcgactgtcgatatacggcagaaattgatgatcgcttgggtgcccggaaagtc  
agttcgctataggtttgcatcgctgcaaaattattaacaaaattcatcattttgatgagattcggtcggaacatgaacagcaggcaattcattgc  
gtactggtgatgaatgccagtttttaaccagacaacaagtatgaattatcgagggttgcgatcaactcgatatacccgtactttgtatggtttacgta  
ccgattttcgaggtaattttattggcagccaatactactggcatggtccgacaaaactggtgaattaaaaaccatctgttttggccgtaaagcaa  
gcatggtgctgctgcttcatcaagcaggcagacctataacgaaggtgagcaggtgtaattggtgtaataacgatacgtttctgtatgcccgtaaa  
cactataaagaggcgttacaagtcgactcattaacggctattcaggaaggcatgccacgattaaTAAGAATTTCTTTACTGACAG  
GGTGAAGCAGGGCACTTTTATCCTGTCAGTTCGTTTTACGCACTTCTTCCGGGCTATATACCTTCTCG  
GCAGTgcattaagtggaaaggggagtgagaatcactccccctggttttata

>Dasd::kanR

TGGTCAAAGATGTGCCAAGAGGAGACCGGCACATTTATACAGCACACATCCCTGTGACGGAAGATC  
ACTTCGCAGAATAAATAAATCCTGGTGTCCCTGTTGATACCGGGAAGCCCTGGGCCAACTTTTGGCG  
AAAATGAGACGTTGATCGGCACGTAAGAGGTTCCAACCTTCCACCATAATGAAATAAGATCACTACCG  
GGCGTATTTTTTGTGATTGTCGAGATTTTCAGGAGCTAAGGAAGCTAAAATGAGCCATATTCAACGGG  
AAACGTCGAGGCCGCGGATTAATTCACACATGGATGCTGATTTATATGGGTATAAATGGGCTCGCGA  
TAATGTCGGGCAATCAGGTGCGACAATCTATCGCTTGTATGGGAAGCCCGATGCGCCAGAGTTGTTT  
CTGAAACATGGCAAAGGTAGCGTTGCCAATGATGTTACAGATGAGATGGTCAGACTAACTGGCTGA  
CGGAATTTATGCCTCTTCCGACCATCAAGCATTATCCGTACTCCTGATGATGCATGGTTACTCACC  
ACTGCGATCCCCGGAACACAGCATTCCAGGTATTAGAAGAATATCCTGATTCAGGTGAAAATATTGT  
TGATGCGCTGGCAGTGTTCCCTGCGCCGTTGCATTCCGATTCCTGTTTGTAAATTGTCCTTTTAAACAGC  
GATCGCGTATTTTCGTCTCGCTCAGGCGCAATCACGAATGAATAACGGTTTGGTTGATGCGAGTGATT  
TTGATACGAGCGTAATGGCTGGCCTGTTGAACAAGTCTGGAAGAAATGCATAAACTTTTGCATT  
CTCACCAGATTCACTGCTCAGTCACTGATGGTGATTTCTCACTTGATAACCTTATTTTTGACGAGGGAAAT  
TAATAGGTTGTATTGATGTTGGACGAGTCGGAATTCGCAGACCGATACCAGGATCTTGCCATCCTATG  
GAACTGCCTCGGTGAGTTTTCTCCTTCAATACAGAAACGGCTTTTTTCAAAAATATGGTATTGATAATCC  
TGATATGAATAAATTGCAGTTTTCAATTTGATGCTCGATGAGTTTTTCTAATTTTTTAAAGCAGTTATTGG  
TGCCCTTAAACGCCTGGTTGCTACGCCTGAATAAGTGATAATAAGCGGATGAATGGCAGAAATTCGA  
AAGCAAATTCGACCCGGTTCGTCGGTTCAGGGCAGGGTCGTTAAATAGCCGCTTATGTCTATTGCTGG  
TTGGCGCGATGCCGCCCTGTTAGTGCGTAATACAGGAGTAAGCGCAGATGT

>Dasd::specR

TGGTCAAAGATGTGCCAAGAGGAGACCGGCACATTTATACAGCACACATCCAGCCAGGACAGAAAT  
GCCTCGACTTCGCTGCTGCCAAGGTTGCCGGGTGACGCACACCGTGGAACGGATGAAGGCACG  
AACCCAGTGGACATAAGCCTGTTCCGTTTCGTAAGCTGTAATGCAAGTAGCGTATGCGCTCACGCAAC  
TGGTCCAGAACCTTGACCGAACGCAGCGGTGTAACGGCGCAGTGCGGTTTTTCATGGCTTGTTAT  
GACTGTTTTTTGGGTACAGTCTATGCCTCGGGCATCCAAGCAGCAAGCGCGTTACGCCGTGGGT  
CGATGTTTGTGTTATGGAGCAGCAACGATGTTACGCAGCAGGGCAGTCGCCCTAAAACAAAGTTAA  
ACATCATGAGGGAAGCGGTGATCGCCGAAGTATCGACTCAACTATCAGAGGTAGTTGGCGTCATCG  
AGCGCCATCTCGAACCGACGTTGCTGGCCGTACATTTGTACGGCTCCGCAGTGGATGGCGGCCGTA  
AGCCACACAGTGATATTGATTTGCTGGTTACGGTGACCGTAAGGCTTGATGAAACAACCGCGGCGAG  
CTTTGATCAACGACCTTTTGGAACTTCGGCTTCCCCTGGAGAGAGCGAGATTCTCCGCGCTGTAGA  
AGTCACCATTGTTGTGCACGACGACATCATTCCGTGGCGTTATCCAGCTAAGCGCGAACTGCAATTT  
GGAGAATGGCAGCGCAATGACATTCTTGCAGGTATCTTCGAGCCAGCCACGATCGACATTGATCTG  
GCTATCTTGCTGACAAAAGCAAGAGAACATAGCGTTGCCTTGGTAGGTCCAGCGGCGGAGGAATC  
TTTGATCCGGTTCCTGAACAGGATCTATTTGAGGCGCTAAATGAAACCTTAAACGCTATGAACTCGC  
CGCCCGACTGGGCTGGCGATGAGCGAAATGTAGTGCTTACGTTGTCCCATTGGTACAGCGCAG  
TAACCGGCAAAATCGCGCCGAAGGATGTCGCTGCCGATGGGCAATGGAGCGCTGCCGCCCCAG  
TATCAGCCCCTCATACTTGAAGCTAGACAGGCTTATCTTGGACAAGAAGAAGATCGCTTGCCCTCGC  
GCGCAGATCAGTTGGAAGAATTTGTCCACTACGTGAAAGGCGAGATACCAAGGTAGTCGGCAAATA  
AAGCTTTACTGAGCTAATAACAGGACTGCTGTAATCGCAGGCCTTTTTATTTCTGCAGGCGCGATG  
CCGCCCTGTTAGTGCGTAATACAGGAGTAAGCGCAGATGT

>DthyA::cmR

TGGTCTGGGCATATCGTCGCAGCCACAGCAACACGTTTCTGAGGAACCCCTGTGACGGAAGATC  
ACTTCGCAGAATAAATAAATCCTGGTGTCCCTGTTGATACCGGGAAGCCCTGGGCCAACTTTTGGCG  
AAAATGAGACGTTGATCGGCACGTAAGAGGTTCCAACCTTCCACCATAATGAAATAAGATCACTACCG  
GGCGTATTTTTTGTGATTGTCGAGATTTTCAGGAGCTAAGGAAGCTAAAATGGAGAAAAAATCACTGG  
ATATAACCACCGTTGATATATCCCAATGGCATCGTAAAGAACATTTTGGAGCATTTCAGTCAGTTGCTC  
AATGTACCTATAACCAGACCGTTCAGCTGGATATTACGGCCTTTTTAAAGACCGTAAAGAAAAATAAG  
CACAAGTTTTATCCGGCCTTTATTACATTCTTGCCCGCCTGATGAATGCTCATCCGGAATTACGTAT  
GGCAATGAAAGACGGTGAGCTGGTGATATGGGATAGTGTACCCTTGTTACACCGTTTTCCATGAG  
CAAATGAAACGTTTTTCATCGCTCTGGAGTGAATACCACGACGATTTCCGGCAGTTTCTACACATATA  
TTCGCAAGATGTGGCGTGTACGGTGAAAACCTGGCCTATTTCCCTAAAGGGTTTATTGAGAATATGT  
TTTTCGTCTCAGCCAATCCCTGGGTGAGTTTACCAGTTTTGATTTAAACGTGGCCAATATGGACAAC  
TTCTTCGCCCCGTTTTTACCATGGGCAAAATATTATACGCAAGGCGACAAGGTGCTGATGCCGCTGG  
CGATTCAGGTTTCATCATGCCGTTTGTGATGGCTTCCATGTCGGCAGAATGCTTAATGAATTACAACAG



TACTGCGATGAGTGGCAGGGCGGGGCGTAATTTTTTTAAGGCAGTTATTGGTGCCCTTAAACGCCTG  
GTTGCTACGCCTGAATAAGTGATAATAAGCGGATGAATGGCAGAAATTCGAAAGCAAATTCGACCCG  
GTCGTCCGTTCCAGGGCAGGGTCGTTAAATAGCCGCTTATGTCTATTGCTGGTTTTACGAAACATCCT  
GCCAGAGCCGACGCCAGTGTGCGTCCGTTTTTTAC

>Dlon:kanR

CAGTCGTGTCATCTGATTACCTGGCGGAAATTAAC TAAGAGAGAGCTCTCctgtgacggaagatcacttcgca  
gaataaataaatcctggtgtccctgttgataccgggaagccctgggccaactttggcgaatgagacggtgatcggcacgtaagaggtccaact  
tcaccataatgaataagatcactaccgggcgatTTTTGAGTTGTCGAGATTTTCAGGAGCTAAGGAAGCTAAATGAGCCATTTCAACGGGAAA  
CGTCGAGGCCGCGATTAAATCCAACATGGATGCTGATTTATATGGGTATAATGGGCTCGGATAATGTCGGGCAATCAGGTGCGACAATCTATCGCT  
TGTATGGGAAGCCCAGTGCAGGAGTTGTTCTGAAACATGGCAAAGGTAGCGTTGCCAATGATGTTACAGATGAGATGGTCAGACTAACTGGCT  
GACGGAATTTATGCCTCTCCGACCATCAAGCATTTATCCGTACTCCTGATGATGATGTTACTCACCCTCGATCCCCGGAAAAACAGCATTCCAG  
GTATTAGAAGAATATCCTGATTCAGGTGAAAATATTGTTGATGCGCTGGCAGTGTCTGCGCGGTTGATTGATTCTCATTGATAACCTTTTACAGC  
GATCGCTATTTCTGCTCGCTCAGGCGCAATCACGAATGAATAACGGTTTGGTTGATGCGAGTGATTTGATGACGAGCGTAATGGCTGGCCTGTTGAC  
AAGTCTGGAAGAAATGATAAATTTGCCATTTCCAGGATTCAGTCTGCTACTCATGGTATTCTCACTGATAACCTTTTACGAGGGGAAAT  
AATAGTTGATTGATGTTGGACGAGTCGGAATCGCAGACCGATACCAGGATCTGCCATCCTATGGAAGTGCCTCGGTGAGTTTCTCCTCATTACAGA  
AACGGCTTTTCAAAAATATGGTATTGATAATCCTGATGATAAATGCAGTTTCATTGATGCTCGATGAGTTTTCTAATTTTTAAGGCAGTTATTGGTGC  
CCTAAACGCCTGGTTGCTACGCCTGAATAAGTGATAATAAGCGGATGAATGGCAGAAATTCGAAAGCAAATTCGACCCGCTCGTCCGTTCCAGGCG  
AGGGTCGTTAAATAGCCGCTTATGCTATTGCTGGTTGACCTCGCGCAAAATGCACTAATAAAAACAGGGCTGGCAGGC  
TAATTCGGG

Supplementary Table 4 | Templates, mutations, escape frequencies in SC, doubling times, and escapee doubling times of synthetic auxotrophs

| Strain                   | Template PDB (id_chain) | Mutations (template numbering)                                           | Day 1 escape rate (escapes/c.f.u.) | Day 2 escape rate (escapes/c.f.u.) | Day 3 escape rate (escapes/c.f.u.) | Day 4 escape rate (escapes/c.f.u.) | Day 5 escape rate (escapes/c.f.u.) | Day 6 escape rate (escapes/c.f.u.) | Day 7 escape rate (escapes/c.f.u.) | Doubling time in 10 $\mu$ M bipA (min) | Doubling time in 100 $\mu$ M bipA (min) | Doubling time of fittest escapee in 10 $\mu$ M bipA (min) | Doubling time of fittest escapee in SC (min) |
|--------------------------|-------------------------|--------------------------------------------------------------------------|------------------------------------|------------------------------------|------------------------------------|------------------------------------|------------------------------------|------------------------------------|------------------------------------|----------------------------------------|-----------------------------------------|-----------------------------------------------------------|----------------------------------------------|
| holB.d1                  | 1A5T_A                  | A190bipA                                                                 | not determined                         | not determined                          | not determined                                            | not determined                               |
| alaS.d5                  | 3HY0_A                  | F90A, F293A, L338bipA, M342A, L349P                                      | 4.93E-02 $\pm$ 3.57E-02            | 7.75E-02 $\pm$ 4.35E-02            | 1.20E-01 $\pm$ 6.17E-02            | not determined                         | not determined                          | not determined                                            | not determined                               |
| alaS.d5_startUAG         | 3HY0_A                  | startUAG, F90A, F293A, L338bipA, M342A, L349P                            | 1.34E-06 $\pm$ 3.46E-07            | 3.86E-02 $\pm$ 1.14E-03            | above detection limit              | above detection limit              | above detection limit              | above detection limit              | 3.63E-01 $\pm$ 7.95E-02*           | 66 $\pm$ 0                             | 100 $\pm$ 1                             | 66 $\pm$ 0                                                | 109 $\pm$ 0                                  |
| metG.d3                  | 3H99_A                  | M485A, F502G, L503bipA                                                   | 7.29E-07 $\pm$ 7.32E-07            | 2.87E-05 $\pm$ 1.23E-05            | above detection limit              | above detection limit              | above detection limit              | above detection limit              | 8.00E-02 $\pm$ 1.67E-02*           | 104 $\pm$ 1                            | no growth                               | 136 $\pm$ 16                                              | 142 $\pm$ 2                                  |
| pgk.d4                   | 1ZMR_A                  | V185A, I187A, I211G, L297bipA                                            | 1.69E-06 $\pm$ 6.12E-07†           | 2.24E-06 $\pm$ 8.06E-07†           | 8.33E-07 $\pm$ 8.34E-07            | 2.08E-06 $\pm$ 4.24E-07            | 2.92E-06 $\pm$ 4.32E-07            | 2.92E-06 $\pm$ 4.32E-07            | 2.92E-06 $\pm$ 4.32E-07            | 94 $\pm$ 1                             | 111 $\pm$ 1                             | 135 $\pm$ 9                                               | 125 $\pm$ 6                                  |
| adk.d4                   | 1E4V_A                  | V103A, V106A, L178bipA, Y182V                                            | 2.38E-07 $\pm$ 2.39E-07            | 1.24E-05 $\pm$ 1.06E-05            | 1.35E-05 $\pm$ 1.16E-05            | 1.49E-05 $\pm$ 1.29E-05            | 1.51E-05 $\pm$ 1.30E-05            | 1.54E-05 $\pm$ 1.31E-05            | 1.57E-05 $\pm$ 1.33E-05            | 75 $\pm$ 1                             | 222 $\pm$ 11                            | 113 $\pm$ 0                                               | 153 $\pm$ 3                                  |
| adk.d6                   | 1E4V_A                  | I4A, L6V, V103A, L178bipA, Y182W, T191I                                  | 5.98E-07 $\pm$ 1.41E-07            | 4.35E-06 $\pm$ 1.47E-06            | 6.79E-06 $\pm$ 2.61E-06            | 9.99E-06 $\pm$ 3.89E-06            | 1.07E-05 $\pm$ 4.08E-06            | 1.11E-05 $\pm$ 4.20E-06            | 1.14E-05 $\pm$ 4.36E-06            | 79 $\pm$ 1                             | 99 $\pm$ 2                              | 77 $\pm$ 0                                                | 225 $\pm$ 3                                  |
| tyrS.d6                  | 2YXN_A                  | F236A, W260F, T263V, F275G, L303bipA, V307A                              | < 2.36E-09                         | 1.27E-07 $\pm$ 9.05E-08            | 2.48E-07 $\pm$ 1.46E-07            | 9.98E-07 $\pm$ 3.99E-07            | 2.54E-06 $\pm$ 6.50E-07            | 4.67E-06 $\pm$ 6.39E-07            | 8.84E-06 $\pm$ 1.63E-06            | 73 $\pm$ 0                             | 103 $\pm$ 3                             | not determined                                            | not determined                               |
| tyrS.d7                  | 2YXN_A                  | L49A, F236A, W260A, T263A, F271W, F275G, L303bipA                        | 1.94E-08 $\pm$ 1.98E-08            | 2.31E-06 $\pm$ 5.62E-07            | > 7.08E-05                         | > 7.08E-05                         | > 7.08E-05                         | > 7.08E-05                         | 2.38E-01 $\pm$ 1.28E-01*           | 72 $\pm$ 0                             | 98 $\pm$ 2                              | 69 $\pm$ 0                                                | 300 $\pm$ 11                                 |
| tyrS.d8                  | 2YXN_A                  | L49A, F236A, W260A, T263A, F271W, F275G, L303bipA, V307A                 | < 3.47E-09                         | 1.04E-08 $\pm$ 7.85E-08            | 5.90E-08 $\pm$ 1.70E-07            | 1.84E-06 $\pm$ 5.22E-07            | 2.75E-06 $\pm$ 6.46E-07            | 5.47E-06 $\pm$ 1.30E-06            | 7.09E-06 $\pm$ 1.52E-06            | 72 $\pm$ 1                             | 91 $\pm$ 1                              | 74 $\pm$ 0                                                | 177 $\pm$ 5                                  |
| adk.d6_tyrS.d6           | n/a                     | adk.d6 + tyrS.d6                                                         | < 7.39E-11†                        | 2.04E-07 $\pm$ 9.03E-08            | 5.69E-07 $\pm$ 1.99E-07            | 1.44E-06 $\pm$ 4.28E-07            | 3.36E-06 $\pm$ 5.23E-07            | 7.60E-06 $\pm$ 1.15E-06            | 1.02E-05 $\pm$ 1.29E-06            | 82 $\pm$ 0                             | 103 $\pm$ 2                             | 83 $\pm$ 0                                                | 353 $\pm$ 2                                  |
| adk.d6_tyrS.d7           | n/a                     | adk.d6 + tyrS.d7                                                         | < 8.30E-11†                        | 3.48E-07 $\pm$ 3.58E-07            | 5.57E-07 $\pm$ 4.90E-07            | 5.01E-06 $\pm$ 2.74E-06            | 5.97E-06 $\pm$ 2.89E-06            | 8.10E-06 $\pm$ 3.60E-06            | 9.14E-06 $\pm$ 3.94E-06            | 83 $\pm$ 2                             | 113 $\pm$ 3                             | 81 $\pm$ 0                                                | 229 $\pm$ 1                                  |
| adk.d6_tyrS.d8           | n/a                     | adk.d6 + tyrS.d8                                                         | < 7.44E-11†                        | < 7.44E-11†                        | < 7.44E-11†                        | < 7.44E-11†                        | 2.90E-06 $\pm$ 2.10E-06            | 5.00E-06 $\pm$ 2.37E-06            | 6.86E-06 $\pm$ 2.30E-06            | 86 $\pm$ 1                             | 120 $\pm$ 5                             | 80 $\pm$ 0                                                | 348 $\pm$ 7                                  |
| adk.d6_tyrS.d6_asd       | n/a                     | adk.d6 + tyrS.d6 + $\Delta$ asd                                          | < 6.41E-11                         | 81 $\pm$ 0                             | 107 $\pm$ 4                             | none observed                                             | none observed                                |
| adk.d6_tyrS.d7_asd       | n/a                     | adk.d6 + tyrS.d7 + $\Delta$ asd                                          | < 5.51E-11                         | 81 $\pm$ 0                             | 109 $\pm$ 3                             | none observed                                             | none observed                                |
| adk.d6_tyrS.d8_asd       | n/a                     | adk.d6 + tyrS.d8 + $\Delta$ asd                                          | < 4.46E-11                         | 89 $\pm$ 0                             | 137 $\pm$ 4                             | none observed                                             | none observed                                |
| adk.d6_quad              | n/a                     | adk.d6-UAGA + pEVOL-bipA-UAGA                                            | 3.01E-06 $\pm$ 7.53E-07            | 1.88E-05 $\pm$ 4.20E-06            | 3.53E-05 $\pm$ 1.40E-05            | 4.88E-05 $\pm$ 2.08E-05            | 5.22E-05 $\pm$ 2.30E-05            | 5.45E-05 $\pm$ 2.38E-05            | 5.45E-05 $\pm$ 2.38E-05            | not determined                         | not determined                          | not determined                                            | not determined                               |
| adk.d6_bipARS.d7         | 1E4V_A                  | adk.d6 + pEVOL_bipARS_1241T, M242A, A245G, L273G, D286R, L287A, V291bipA | 4.07E-09 $\pm$ 4.07E-09            | 4.07E-09 $\pm$ 4.07E-09            | 4.07E-09 $\pm$ 4.07E-09            | 8.13E-09 $\pm$ 4.08E-09            | 8.13E-09 $\pm$ 4.08E-09            | 3.66E-08 $\pm$ 2.54E-08            | 5.69E-08 $\pm$ 2.86E-08            | not determined                         | not determined                          | not determined                                            | not determined                               |
| adk.d6_int               | 1E4V_A                  | adk.d6 + $\Delta$ tdk; pEVOL-bipA                                        | < 3.47E-08                         | < 3.47E-08                         | < 3.47E-08                         | 3.47E-08 $\pm$ 3.47E-08            | 3.47E-08 $\pm$ 3.47E-08            | 3.47E-08 $\pm$ 3.47E-08            | 3.47E-08 $\pm$ 3.47E-08            | not determined                         | not determined                          | not determined                                            | not determined                               |
| adk.d6_tyrS.d8_bipARS.d7 | n/a                     | adk.d6_bipARS.d7 + tyrS.d8                                               | < 2.25E-12                         | < 2.25E-12 (monitored for 14 days) | 102 $\pm$ 0                            | 88 $\pm$ 1 (55, R <sup>2</sup> =0.998)  | none observed                                             | none observed                                |
| adk.d6_tyrS.d8_int       | n/a                     | adk.d6_int + tyrS.d8                                                     | < 2.18E-12                         | < 2.18E-12 (monitored for 14 days) | 427 $\pm$ 38                           | 81 $\pm$ 1 (57, R <sup>2</sup> =0.999)  | none observed                                             | none observed                                |

Errors reported are s.e.m. (Methods)

\* Determined from additional plating at low density

† Determined from additional plating at high density

&lt; Indicates escape frequency below given detection limit

Doubling times in parentheses are from growth in culture tubes rather than in a microplate reader (Methods)

Supplementary Table 5 | Escape frequencies of synthetic auxotrophs in SCA

| Strain                       | Day 1<br>escape rate<br>(escapes/c.f.u.) | Day 2<br>escape rate<br>(escapes/c.f.u.) | Day 3<br>escape rate<br>(escapes/c.f.u.) | Day 4<br>escape rate<br>(escapes/c.f.u.) | Day 5<br>escape rate<br>(escapes/c.f.u.) | Day 6<br>escape rate<br>(escapes/c.f.u.) | Day 7<br>escape rate<br>(escapes/c.f.u.) |
|------------------------------|------------------------------------------|------------------------------------------|------------------------------------------|------------------------------------------|------------------------------------------|------------------------------------------|------------------------------------------|
| holB.d1                      | not determined                           |
| alaS.d5                      | not collected                            | 1.88E-01 ±<br>5.73E-02                   | 1.97E-01 ±<br>5.57E-02                   |
| alaS.d5.<br>startUAG         | 1.04E-05 ±<br>8.42E-06                   | above detection<br>limit                 |
| metG.d3                      | above detection<br>limit                 |
| pgk.d4                       | 4.17E-07 ±<br>4.17E-07                   | 2.08E-06 ±<br>1.11E-06                   | 1.38E-05 ±<br>9.45E-06                   | 1.26E-04 ±<br>1.09E-04                   | 1.66E-04 ±<br>1.16E-04                   | 1.96E-04 ±<br>1.16E-04                   | 2.06E-04 ±<br>1.18E-04                   |
| adk.d4                       | 1.07E-06 ±<br>1.01E-06                   | 1.04E-04 ±<br>5.62E-05                   | 1.07E-04 ±<br>5.66E-05                   | 1.09E-04 ±<br>5.74E-05                   | 1.09E-04 ±<br>5.74E-05                   | 1.09E-04 ±<br>5.73E-05                   | 1.09E-04 ±<br>5.74E-05                   |
| adk.d6                       | 1.16E-05 ±<br>2.27E-06                   | 2.28E-05 ±<br>2.11E-06                   | 2.89E-05 ±<br>2.96E-06                   | 3.35E-05 ±<br>3.47E-06                   | 4.03E-05 ±<br>4.67E-06                   | 4.43E-05 ±<br>4.91E-06                   | 4.43E-05 ±<br>4.91E-06                   |
| tyrS.d6                      | < 2.36E-09                               | 3.58E-07 ±<br>2.32E-07                   | 8.25E-07 ±<br>2.92E-07                   | 2.04E-06 ±<br>3.38E-07                   | 2.57E-06 ±<br>2.58E-07                   | 2.83E-06 ±<br>2.14E-07                   | 3.26E-06 ±<br>1.73E-07                   |
| tyrS.d7                      | < 2.16E-09                               | 1.79E-06 ±<br>4.14E-07                   | above detection<br>limit                 |
| tyrS.d8                      | 3.47E-09 ±<br>3.55E-09                   | 1.51E-06 ±<br>5.86E-07                   | 2.14E-06 ±<br>7.61E-07                   | 4.94E-06 ±<br>1.33E-06                   | 5.83E-06 ±<br>1.54E-06                   | 7.65E-06 ±<br>1.98E-06                   | 8.49E-06 ±<br>2.09E-06                   |
| adk.d6_tyrS.d6               | < 6.41E-11                               | 1.38E-07 ±<br>5.58E-08                   | 2.96E-07 ±<br>7.68E-08                   | 2.39E-06 ±<br>1.12E-06                   | 3.87E-06 ±<br>9.64E-07                   | 6.02E-06 ±<br>1.27E-06                   | 6.92E-06 ±<br>1.54E-06                   |
| adk.d6_tyrS.d7               | < 3.16E-09                               | 2.06E-07 ±<br>1.86E-07                   | 6.90E-07 ±<br>3.90E-07                   | 7.53E-06 ±<br>2.61E-06                   | 7.85E-06 ±<br>2.68E-06                   | 8.03E-06 ±<br>2.73E-06                   | 8.19E-06 ±<br>2.78E-06                   |
| adk.d6_tyrS.d8               | < 4.24E-09                               | 2.97E-08 ±<br>2.49E-08                   | 8.47E-08 ±<br>2.95E-08                   | 1.06E-07 ±<br>4.38E-08                   | 2.33E-06 ±<br>1.54E-06                   | 7.23E-06 ±<br>4.00E-06                   | 8.40E-06 ±<br>4.25E-06                   |
| adk.d6_tyrS.d6_<br>asd       | < 6.41E-11                               | 1.09E-09 ±<br>8.19E-10                   | 1.54E-09 ±<br>8.89E-10                   | 1.67E-09 ±<br>1.00E-09                   | 1.79E-09 ±<br>1.00E-09                   | 1.86E-09 ±<br>1.01E-09                   | 1.92E-09 ±<br>1.02E-09                   |
| adk.d6_tyrS.d7_<br>asd       | 6.62E-10 ±<br>4.41E-10                   | 2.59E-09 ±<br>2.29E-09                   | 3.75E-09 ±<br>3.29E-09                   | 3.86E-09 ±<br>3.40E-09                   | 3.92E-09 ±<br>3.37E-09                   | 3.92E-09 ±<br>3.37E-09                   | 3.97E-09 ±<br>3.42E-09                   |
| adk.d6_tyrS.d8_<br>asd       | < 4.46E-11                               |
| adk.d6_quad                  | 6.24E-05 ±<br>1.25E-05                   | 2.84E-04 ±<br>5.83E-05                   | 3.97E-04 ±<br>4.44E-05                   | 5.36E-04 ±<br>7.02E-05                   | 5.80E-04 ±<br>7.08E-05                   | 6.03E-04 ±<br>7.26E-05                   | 6.12E-04 ±<br>7.09E-05                   |
| adk.d6_<br>bipARS.d7         | 0.00E+00                                 | 4.07E-09 ±<br>4.07E-09                   | 3.25E-08 ±<br>4.31E-09                   | 3.66E-08 ±<br>7.22E-09                   | 3.66E-08 ±<br>7.22E-09                   | 3.66E-08 ±<br>7.22E-09                   | 3.66E-08 ±<br>7.22E-09                   |
| adk.d6_int                   | 3.82E-07 ±<br>2.84E-07                   | 3.82E-07 ±<br>2.84E-07                   | 4.17E-07 ±<br>2.62E-07                   | 4.86E-07 ±<br>2.78E-07                   | 5.21E-07 ±<br>2.62E-07                   | 5.90E-07 ±<br>2.28E-07                   | 5.90E-07 ±<br>2.28E-07                   |
| adk.d6_tyrS.d8_<br>bipARS.d7 | < 4.63E-11                               |
| adk.d6_tyrS.d8_<br>int       | < 4.54E-11                               |

Errors reported are s.e.m. (Methods)

&lt; Indicates escape frequency below given detection limit

## Supplementary Table 6 | Codon and amino acid frequencies for UAG saturation mutagenesis

## alaS.d5 UAG-&gt;NNN codon selection

| Codon | 1 hr | 4 hr | Confluent 1 | Confluent 2 | Confluent 3 |
|-------|------|------|-------------|-------------|-------------|
| AAA   | 434  | 280  | 234         | 35          | 26          |
| AAC   | 470  | 567  | 397         | 2932        | 8470        |
| AAG   | 827  | 630  | 679         | 385         | 166         |
| AAT   | 569  | 677  | 572         | 4595        | 13072       |
| ACA   | 512  | 523  | 334         | 2804        | 7940        |
| ACC   | 513  | 518  | 347         | 2576        | 7108        |
| ACG   | 414  | 464  | 305         | 2497        | 6853        |
| ACT   | 575  | 614  | 456         | 3396        | 9492        |
| AGA   | 401  | 281  | 266         | 89          | 44          |
| AGC   | 441  | 444  | 358         | 2628        | 7247        |
| AGG   | 366  | 257  | 180         | 83          | 84          |
| AGT   | 468  | 556  | 487         | 3346        | 9450        |
| ATA   | 628  | 657  | 539         | 4399        | 12010       |
| ATC   | 727  | 776  | 694         | 3684        | 10547       |
| ATG   | 758  | 731  | 581         | 3542        | 9641        |
| ATT   | 802  | 774  | 665         | 5140        | 15402       |
| CAA   | 471  | 508  | 370         | 2602        | 6656        |
| CAC   | 469  | 522  | 361         | 2230        | 6508        |
| CAG   | 744  | 688  | 663         | 2201        | 4723        |
| CAT   | 616  | 694  | 534         | 3408        | 9372        |
| CCA   | 421  | 279  | 217         | 47          | 37          |
| CCC   | 407  | 260  | 165         | 81          | 31          |
| CCG   | 582  | 444  | 399         | 277         | 277         |
| CCT   | 426  | 234  | 177         | 40          | 19          |
| CGA   | 433  | 264  | 247         | 108         | 146         |
| CGC   | 429  | 252  | 191         | 42          | 41          |
| CGG   | 347  | 216  | 173         | 63          | 63          |
| CGT   | 694  | 362  | 323         | 121         | 94          |
| CTA   | 565  | 681  | 512         | 3336        | 9816        |
| CTC   | 468  | 549  | 421         | 2811        | 8046        |
| CTG   | 453  | 470  | 429         | 2782        | 7622        |
| CTT   | 626  | 629  | 570         | 3970        | 12187       |
| GAA   | 382  | 452  | 376         | 2003        | 4059        |
| GAC   | 659  | 650  | 491         | 916         | 713         |
| GAG   | 571  | 537  | 537         | 1879        | 3469        |
| GAT   | 627  | 627  | 563         | 1154        | 971         |
| GCA   | 495  | 502  | 326         | 2677        | 6810        |
| GCC   | 560  | 656  | 516         | 2296        | 6184        |
| GCG   | 420  | 363  | 298         | 1867        | 4910        |
| GCT   | 561  | 534  | 412         | 2925        | 7505        |
| GGA   | 424  | 445  | 359         | 2148        | 5040        |
| GGC   | 641  | 734  | 561         | 2332        | 5308        |
| GGG   | 377  | 301  | 282         | 1425        | 3504        |
| GGT   | 5057 | 4893 | 4962        | 5991        | 10615       |
| GTA   | 704  | 771  | 660         | 3625        | 10506       |
| GTC   | 5887 | 5894 | 5951        | 7840        | 14533       |
| GTG   | 557  | 458  | 339         | 2523        | 7181        |

|       |        |        |        |        |        |
|-------|--------|--------|--------|--------|--------|
| GTT   | 823    | 891    | 855    | 4446   | 12142  |
| TAA   | 768    | 512    | 388    | 114    | 81     |
| TAC   | 705    | 877    | 761    | 4385   | 12945  |
| TAG   | 581822 | 562326 | 551652 | 305073 | 114316 |
| TAT   | 902    | 1018   | 1033   | 5845   | 17549  |
| TCA   | 646    | 624    | 560    | 3572   | 9647   |
| TCC   | 2051   | 2106   | 2116   | 4899   | 11583  |
| TCG   | 629    | 593    | 460    | 3235   | 9025   |
| TCT   | 395    | 201    | 312    | 2398   | 6784   |
| TGA   | 619    | 385    | 259    | 68     | 87     |
| TGC   | 657    | 706    | 525    | 3867   | 10883  |
| TGG   | 11110  | 10570  | 10425  | 11089  | 18011  |
| TGT   | 1017   | 1205   | 1154   | 5443   | 14346  |
| TTA   | 738    | 869    | 785    | 6500   | 18871  |
| TTC   | 811    | 976    | 903    | 5252   | 14948  |
| TTG   | 1109   | 1236   | 1129   | 5143   | 14591  |
| TTT   | 749    | 864    | 914    | 6632   | 19313  |
| Total | 640529 | 619577 | 603710 | 485812 | 579620 |

**adk.d4 UAG->NNN codon selection**

| Codon | 1 hr | 4 hr | Confluent 1 | Confluent 2 | Confluent 3 |
|-------|------|------|-------------|-------------|-------------|
| AAA   | 153  | 455  | 60          | 17          | 11          |
| AAC   | 237  | 502  | 105         | 45          | 50          |
| AAG   | 403  | 727  | 123         | 52          | 81          |
| AAT   | 312  | 927  | 143         | 36          | 43          |
| ACA   | 340  | 965  | 4061        | 3568        | 2996        |
| ACC   | 204  | 535  | 1862        | 1288        | 341         |
| ACG   | 179  | 460  | 3974        | 2731        | 596         |
| ACT   | 7086 | 8160 | 9936        | 7584        | 5538        |
| AGA   | 239  | 538  | 87          | 34          | 56          |
| AGC   | 223  | 604  | 622         | 529         | 492         |
| AGG   | 214  | 600  | 48          | 8           | 10          |
| AGT   | 375  | 1013 | 93          | 6           | 23          |
| ATA   | 370  | 955  | 11111       | 9564        | 8685        |
| ATC   | 347  | 1073 | 8974        | 7333        | 6806        |
| ATG   | 428  | 1072 | 15608       | 16600       | 15749       |
| ATT   | 749  | 2096 | 31875       | 27557       | 25765       |
| CAA   | 154  | 441  | 49          | 9           | 16          |
| CAC   | 250  | 557  | 184         | 111         | 144         |
| CAG   | 904  | 1416 | 3794        | 3458        | 3292        |
| CAT   | 315  | 885  | 112         | 27          | 28          |
| CCA   | 163  | 433  | 54          | 11          | 20          |
| CCC   | 185  | 467  | 55          | 19          | 15          |
| CCG   | 234  | 503  | 139         | 46          | 44          |
| CCT   | 298  | 893  | 128         | 30          | 33          |
| CGA   | 172  | 497  | 55          | 15          | 11          |
| CGC   | 172  | 520  | 62          | 27          | 23          |
| CGG   | 762  | 1201 | 1770        | 1519        | 3048        |
| CGT   | 415  | 1172 | 131         | 24          | 10          |
| CTA   | 337  | 933  | 19021       | 19535       | 17501       |
| CTC   | 386  | 929  | 20211       | 20813       | 20438       |

|       |        |        |        |        |        |
|-------|--------|--------|--------|--------|--------|
| CTG   | 7804   | 8732   | 30312  | 29906  | 26691  |
| CTT   | 745    | 2097   | 50471  | 51862  | 52212  |
| GAA   | 774    | 1056   | 1860   | 1695   | 3394   |
| GAC   | 6115   | 6693   | 8498   | 7209   | 6732   |
| GAG   | 303    | 681    | 163    | 84     | 141    |
| GAT   | 431    | 1091   | 172    | 66     | 105    |
| GCA   | 370    | 709    | 353    | 279    | 269    |
| GCC   | 199    | 548    | 95     | 22     | 32     |
| GCG   | 303    | 655    | 262    | 106    | 148    |
| GCT   | 436    | 1154   | 188    | 65     | 80     |
| GGA   | 669    | 1178   | 1606   | 1339   | 2957   |
| GGC   | 263    | 668    | 160    | 66     | 98     |
| GGG   | 219    | 669    | 65     | 19     | 18     |
| GGT   | 461    | 1234   | 119    | 22     | 22     |
| GTA   | 361    | 1003   | 13513  | 14382  | 14658  |
| GTC   | 374    | 1075   | 10041  | 10307  | 10877  |
| GTG   | 348    | 1110   | 14207  | 15168  | 14869  |
| GTT   | 816    | 2196   | 29537  | 31407  | 31643  |
| TAA   | 405    | 992    | 116    | 23     | 38     |
| TAC   | 375    | 940    | 3230   | 1345   | 747    |
| TAG   | 299876 | 282570 | 36240  | 558    | 121    |
| TAT   | 689    | 1723   | 10556  | 6426   | 4443   |
| TCA   | 250    | 757    | 103    | 14     | 19     |
| TCC   | 312    | 871    | 73     | 6      | 19     |
| TCG   | 464    | 1008   | 133    | 57     | 56     |
| TCT   | 577    | 1649   | 103    | 11     | 12     |
| TGA   | 563    | 1379   | 448    | 325    | 322    |
| TGC   | 1487   | 2275   | 4170   | 2372   | 1039   |
| TGG   | 483    | 1200   | 403    | 68     | 11     |
| TGT   | 693    | 2145   | 8670   | 4111   | 483    |
| TTA   | 637    | 1835   | 48622  | 51252  | 47156  |
| TTC   | 638    | 1667   | 4674   | 1925   | 845    |
| TTG   | 850    | 2212   | 62408  | 65456  | 63594  |
| TTT   | 1288   | 3644   | 6725   | 2865   | 1323   |
| Total | 347184 | 370945 | 482743 | 423414 | 397039 |

**adk.d6 UAG->NNN codon selection**

| Codon | 1 hr | 4 hr | Confluent 1 | Confluent 2 | Confluent 3 |
|-------|------|------|-------------|-------------|-------------|
| AAA   | 435  | 186  | 68          | 18          | 17          |
| AAC   | 468  | 249  | 98          | 55          | 38          |
| AAG   | 776  | 556  | 292         | 94          | 128         |
| AAT   | 833  | 419  | 147         | 44          | 44          |
| ACA   | 8859 | 7837 | 6954        | 3858        | 2803        |
| ACC   | 478  | 209  | 102         | 74          | 56          |
| ACG   | 531  | 160  | 69          | 12          | 18          |
| ACT   | 1518 | 665  | 3303        | 5895        | 4436        |
| AGA   | 446  | 259  | 135         | 60          | 75          |
| AGC   | 1887 | 1488 | 1247        | 687         | 498         |
| AGG   | 491  | 211  | 46          | 25          | 25          |
| AGT   | 902  | 383  | 58          | 18          | 19          |
| ATA   | 778  | 409  | 1805        | 3994        | 3012        |



|     |        |        |        |        |       |
|-----|--------|--------|--------|--------|-------|
| ATC | 864    | 416    | 1989   | 4238   | 3513  |
| ATG | 981    | 484    | 13653  | 17237  | 9526  |
| ATT | 1693   | 886    | 6950   | 16125  | 12856 |
| CAA | 385    | 188    | 60     | 17     | 10    |
| CAC | 538    | 277    | 223    | 152    | 113   |
| CAG | 10608  | 9240   | 7619   | 4205   | 3045  |
| CAT | 797    | 358    | 127    | 34     | 21    |
| CCA | 384    | 182    | 59     | 19     | 15    |
| CCC | 406    | 200    | 62     | 13     | 12    |
| CCG | 447    | 218    | 120    | 63     | 55    |
| CCT | 695    | 293    | 85     | 50     | 41    |
| CGA | 488    | 229    | 40     | 8      | 5     |
| CGC | 472    | 196    | 54     | 24     | 30    |
| CGG | 1124   | 713    | 1430   | 3238   | 4069  |
| CGT | 1055   | 432    | 108    | 34     | 19    |
| CTA | 810    | 404    | 13504  | 24116  | 17664 |
| CTC | 795    | 402    | 10116  | 14076  | 7790  |
| CTG | 1752   | 949    | 21830  | 41540  | 32554 |
| CTT | 1722   | 873    | 49594  | 106967 | 85277 |
| GAA | 864    | 674    | 1512   | 3439   | 4382  |
| GAC | 8515   | 7108   | 8589   | 7995   | 6091  |
| GAG | 739    | 374    | 199    | 174    | 217   |
| GAT | 1062   | 467    | 184    | 76     | 51    |
| GCA | 663    | 395    | 350    | 281    | 202   |
| GCC | 471    | 189    | 64     | 34     | 18    |
| GCG | 772    | 355    | 227    | 251    | 265   |
| GCT | 1032   | 413    | 171    | 106    | 63    |
| GGA | 883    | 517    | 1245   | 3071   | 3870  |
| GGC | 737    | 299    | 141    | 78     | 63    |
| GGG | 635    | 270    | 69     | 35     | 50    |
| GGT | 1063   | 436    | 113    | 21     | 11    |
| GTA | 884    | 418    | 9612   | 12564  | 7065  |
| GTC | 837    | 404    | 9706   | 14608  | 9821  |
| GTG | 997    | 479    | 14193  | 32387  | 40571 |
| GTT | 2020   | 956    | 20328  | 23316  | 11081 |
| TAA | 908    | 477    | 205    | 33     | 25    |
| TAC | 890    | 430    | 234    | 132    | 105   |
| TAG | 384963 | 350206 | 205074 | 4079   | 128   |
| TAT | 1664   | 747    | 242    | 35     | 13    |
| TCA | 714    | 260    | 63     | 26     | 9     |
| TCC | 795    | 310    | 74     | 11     | 20    |
| TCG | 1034   | 489    | 203    | 58     | 73    |
| TCT | 1482   | 601    | 162    | 14     | 4     |
| TGA | 1207   | 657    | 465    | 407    | 297   |
| TGC | 1095   | 450    | 668    | 1002   | 740   |
| TGG | 1193   | 534    | 158    | 7      | 9     |
| TGT | 1930   | 814    | 148    | 9      | 2     |
| TTA | 1582   | 843    | 32333  | 59986  | 37764 |
| TTC | 1593   | 635    | 196    | 89     | 62    |
| TTG | 2133   | 1154   | 33147  | 61493  | 43687 |
| TTT | 3285   | 1444   | 430    | 183    | 100   |

|       |        |        |        |        |        |
|-------|--------|--------|--------|--------|--------|
| Total | 473060 | 403776 | 482452 | 472990 | 354643 |
|-------|--------|--------|--------|--------|--------|

**pgk.d4 UAG->NNN codon selection**

| Codon | 1 hr  | 4 hr  | Confluent 1 | Confluent 2 | Confluent 3 |
|-------|-------|-------|-------------|-------------|-------------|
| AAA   | 12940 | 11993 | 9016        | 10859       | 9349        |
| AAC   | 411   | 152   | 89          | 33          | 45          |
| AAG   | 502   | 282   | 319         | 184         | 319         |
| AAT   | 1960  | 1400  | 1068        | 1057        | 958         |
| ACA   | 477   | 194   | 341         | 221         | 493         |
| ACC   | 640   | 220   | 135         | 13          | 16          |
| ACG   | 560   | 188   | 109         | 19          | 19          |
| ACT   | 832   | 296   | 196         | 12          | 12          |
| AGA   | 492   | 269   | 426         | 239         | 377         |
| AGC   | 1045  | 922   | 6450        | 5621        | 9972        |
| AGG   | 415   | 177   | 310         | 204         | 471         |
| AGT   | 685   | 240   | 147         | 8           | 21          |
| ATA   | 792   | 316   | 231         | 2227        | 674         |
| ATC   | 1180  | 568   | 429         | 2810        | 915         |
| ATG   | 988   | 404   | 286         | 29802       | 29054       |
| ATT   | 1431  | 491   | 373         | 4839        | 1259        |
| CAA   | 443   | 174   | 132         | 48          | 66          |
| CAC   | 997   | 663   | 4964        | 4369        | 7873        |
| CAG   | 631   | 404   | 502         | 227         | 326         |
| CAT   | 761   | 323   | 202         | 33          | 35          |
| CCA   | 528   | 203   | 185         | 72          | 103         |
| CCC   | 784   | 241   | 201         | 59          | 133         |
| CCG   | 712   | 247   | 159         | 36          | 39          |
| CCT   | 1091  | 362   | 242         | 33          | 43          |
| CGA   | 564   | 283   | 378         | 246         | 457         |
| CGC   | 657   | 230   | 148         | 32          | 49          |
| CGG   | 632   | 327   | 247         | 105         | 98          |
| CGT   | 1301  | 819   | 2024        | 1513        | 2258        |
| CTA   | 928   | 416   | 1689        | 14719       | 10765       |
| CTC   | 1005  | 379   | 330         | 11669       | 6971        |
| CTG   | 1205  | 662   | 478         | 19570       | 11733       |
| CTT   | 1648  | 620   | 576         | 27985       | 17350       |
| GAA   | 5929  | 5404  | 4665        | 5525        | 5070        |
| GAC   | 411   | 182   | 174         | 90          | 136         |
| GAG   | 591   | 357   | 818         | 611         | 1141        |
| GAT   | 696   | 295   | 236         | 50          | 91          |
| GCA   | 1148  | 1004  | 6668        | 5817        | 10780       |
| GCC   | 567   | 213   | 141         | 48          | 115         |
| GCG   | 834   | 656   | 2012        | 1695        | 2413        |
| GCT   | 907   | 362   | 198         | 9           | 13          |
| GGA   | 525   | 314   | 217         | 132         | 113         |
| GGC   | 536   | 191   | 180         | 72          | 180         |
| GGG   | 433   | 170   | 96          | 5           | 8           |
| GGT   | 821   | 266   | 166         | 7           | 11          |
| GTA   | 678   | 266   | 162         | 163         | 29          |
| GTC   | 859   | 360   | 648         | 724         | 752         |
| GTG   | 945   | 367   | 267         | 263         | 49          |

|       |        |        |        |        |        |
|-------|--------|--------|--------|--------|--------|
| GTT   | 1698   | 900    | 1801   | 1560   | 1731   |
| TAA   | 721    | 383    | 240    | 77     | 55     |
| TAC   | 843    | 412    | 347    | 20622  | 20549  |
| TAG   | 595312 | 588683 | 413664 | 60275  | 5963   |
| TAT   | 1264   | 613    | 509    | 37015  | 37711  |
| TCA   | 708    | 287    | 403    | 256    | 451    |
| TCC   | 947    | 342    | 382    | 178    | 332    |
| TCG   | 986    | 501    | 466    | 191    | 349    |
| TCT   | 1342   | 643    | 1686   | 1333   | 2381   |
| TGA   | 5099   | 4321   | 3639   | 4330   | 3790   |
| TGC   | 1050   | 410    | 300    | 3913   | 1250   |
| TGG   | 995    | 455    | 307    | 22     | 15     |
| TGT   | 1422   | 569    | 459    | 8027   | 2448   |
| TTA   | 1219   | 456    | 445    | 22558  | 13746  |
| TTC   | 1629   | 868    | 1161   | 65049  | 75582  |
| TTG   | 1819   | 794    | 634    | 31758  | 19803  |
| TTT   | 2356   | 974    | 1160   | 137316 | 164670 |
| Total | 674527 | 636483 | 476633 | 548555 | 483980 |

**metG.d3 UAG->NNN codon selection**

| Codon | 1 hr | 4 hr | Confluent 1 | Confluent 2 | Confluent 3 |
|-------|------|------|-------------|-------------|-------------|
| AAA   | 141  | 140  | 105         | 33          | 32          |
| AAC   | 131  | 116  | 111         | 92          | 125         |
| AAG   | 562  | 549  | 576         | 419         | 493         |
| AAT   | 123  | 119  | 96          | 90          | 87          |
| ACA   | 109  | 124  | 215         | 2626        | 1759        |
| ACC   | 64   | 62   | 129         | 1360        | 864         |
| ACG   | 61   | 56   | 104         | 1267        | 945         |
| ACT   | 44   | 41   | 128         | 1376        | 981         |
| AGA   | 191  | 214  | 310         | 250         | 492         |
| AGC   | 2493 | 2489 | 2425        | 2475        | 3429        |
| AGG   | 1039 | 1194 | 1058        | 1037        | 1356        |
| AGT   | 104  | 109  | 150         | 142         | 175         |
| ATA   | 122  | 181  | 485         | 43156       | 64191       |
| ATC   | 460  | 618  | 1183        | 24708       | 37555       |
| ATG   | 176  | 308  | 411         | 38425       | 68619       |
| ATT   | 63   | 87   | 294         | 26417       | 40023       |
| CAA   | 93   | 93   | 69          | 28          | 48          |
| CAC   | 84   | 43   | 89          | 86          | 203         |
| CAG   | 4952 | 5128 | 6009        | 5446        | 7333        |
| CAT   | 105  | 126  | 132         | 120         | 118         |
| CCA   | 93   | 55   | 43          | 26          | 49          |
| CCC   | 37   | 21   | 28          | 12          | 38          |
| CCG   | 26   | 22   | 29          | 20          | 27          |
| CCT   | 44   | 25   | 19          | 10          | 11          |
| CGA   | 51   | 41   | 42          | 8           | 15          |
| CGC   | 66   | 48   | 38          | 26          | 49          |
| CGG   | 63   | 49   | 175         | 262         | 467         |
| CGT   | 37   | 23   | 34          | 7           | 16          |
| CTA   | 60   | 92   | 266         | 24982       | 34855       |
| CTC   | 57   | 60   | 178         | 14504       | 21542       |

|       |        |        |        |        |        |
|-------|--------|--------|--------|--------|--------|
| CTG   | 66     | 77     | 154    | 12951  | 18632  |
| CTT   | 48     | 51     | 166    | 15826  | 23083  |
| GAA   | 336    | 424    | 841    | 1343   | 2644   |
| GAC   | 41     | 38     | 30     | 22     | 43     |
| GAG   | 142    | 176    | 151    | 99     | 142    |
| GAT   | 144    | 153    | 244    | 265    | 453    |
| GCA   | 9952   | 9829   | 9453   | 9630   | 12309  |
| GCC   | 52     | 41     | 49     | 126    | 141    |
| GCG   | 44     | 49     | 42     | 111    | 174    |
| GCT   | 49     | 31     | 45     | 103    | 87     |
| GGA   | 238    | 409    | 336    | 372    | 760    |
| GGC   | 185    | 117    | 859    | 91     | 168    |
| GGG   | 56     | 58     | 34     | 17     | 41     |
| GGT   | 57     | 55     | 68     | 29     | 61     |
| GTA   | 114    | 122    | 259    | 11797  | 18735  |
| GTC   | 81     | 87     | 168    | 7012   | 10760  |
| GTG   | 68     | 66     | 192    | 9983   | 15497  |
| GTT   | 56     | 66     | 162    | 6361   | 9734   |
| TAA   | 201    | 208    | 175    | 85     | 64     |
| TAC   | 89     | 100    | 170    | 8220   | 10119  |
| TAG   | 440300 | 435794 | 353213 | 70412  | 8273   |
| TAT   | 206    | 338    | 346    | 12272  | 14071  |
| TCA   | 414    | 551    | 928    | 967    | 1226   |
| TCC   | 25     | 26     | 45     | 37     | 41     |
| TCG   | 107    | 110    | 206    | 233    | 438    |
| TCT   | 47     | 34     | 37     | 33     | 26     |
| TGA   | 4884   | 1885   | 11177  | 1267   | 2375   |
| TGC   | 80     | 60     | 143    | 6663   | 7634   |
| TGG   | 150    | 150    | 130    | 84     | 131    |
| TGT   | 148    | 244    | 238    | 7212   | 8804   |
| TTA   | 65     | 108    | 323    | 27847  | 41861  |
| TTC   | 31     | 44     | 133    | 7053   | 9445   |
| TTG   | 174    | 180    | 839    | 19597  | 30468  |
| TTT   | 51     | 52     | 147    | 10039  | 12515  |
| Total | 470352 | 463966 | 396434 | 437569 | 546852 |

**tyrS.d6 UAG->NNN codon selection**

| Codon | 1 hr | 4 hr | Confluent 1 | Confluent 2 | Confluent 3 |
|-------|------|------|-------------|-------------|-------------|
| AAA   | 213  | 153  | 97          | 19          | 22          |
| AAC   | 392  | 250  | 109         | 12          | 7           |
| AAG   | 505  | 422  | 469         | 47          | 120         |
| AAT   | 782  | 607  | 309         | 77          | 49          |
| ACA   | 649  | 562  | 361         | 226         | 171         |
| ACC   | 8019 | 8493 | 8291        | 6230        | 5016        |
| ACG   | 650  | 411  | 203         | 14          | 17          |
| ACT   | 1600 | 1109 | 464         | 106         | 121         |
| AGA   | 329  | 221  | 131         | 6           | 14          |
| AGC   | 534  | 327  | 163         | 19          | 31          |
| AGG   | 474  | 292  | 137         | 5           | 11          |
| AGT   | 1367 | 866  | 3219        | 882         | 2575        |
| ATA   | 828  | 637  | 385         | 114         | 76          |

|     |        |        |        |        |       |
|-----|--------|--------|--------|--------|-------|
| ATC | 1347   | 925    | 603    | 46     | 27    |
| ATG | 1336   | 889    | 2107   | 1140   | 294   |
| ATT | 2906   | 2120   | 1163   | 105    | 30    |
| CAA | 578    | 508    | 344    | 201    | 145   |
| CAC | 917    | 722    | 536    | 265    | 208   |
| CAG | 1341   | 1325   | 1439   | 859    | 707   |
| CAT | 1534   | 1093   | 386    | 138    | 90    |
| CCA | 6012   | 4962   | 7932   | 10955  | 9367  |
| CCC | 6574   | 5432   | 8992   | 11176  | 9989  |
| CCG | 1449   | 1063   | 1201   | 422    | 626   |
| CCT | 3389   | 2576   | 1456   | 473    | 552   |
| CGA | 693    | 461    | 189    | 15     | 15    |
| CGC | 555    | 279    | 248    | 145    | 132   |
| CGG | 1060   | 616    | 256    | 25     | 31    |
| CGT | 2539   | 1723   | 652    | 72     | 95    |
| CTA | 1628   | 1304   | 6930   | 29792  | 19840 |
| CTC | 2756   | 2084   | 10971  | 48854  | 30926 |
| CTG | 2585   | 1906   | 14710  | 56499  | 48050 |
| CTT | 5919   | 4542   | 26800  | 115601 | 72987 |
| GAA | 398    | 322    | 166    | 88     | 66    |
| GAC | 751    | 607    | 337    | 133    | 108   |
| GAG | 612    | 453    | 3078   | 780    | 2521  |
| GAT | 1335   | 887    | 344    | 19     | 24    |
| GCA | 888    | 838    | 1510   | 3257   | 1339  |
| GCC | 5621   | 4610   | 9721   | 14723  | 10505 |
| GCG | 849    | 597    | 1686   | 4573   | 1875  |
| GCT | 2508   | 1958   | 7435   | 13635  | 14450 |
| GGA | 543    | 360    | 136    | 11     | 15    |
| GGC | 690    | 456    | 266    | 41     | 33    |
| GGG | 761    | 457    | 213    | 5      | 2     |
| GGT | 1901   | 1308   | 511    | 31     | 71    |
| GTA | 1189   | 872    | 455    | 65     | 46    |
| GTC | 2320   | 1691   | 793    | 241    | 398   |
| GTG | 2042   | 1333   | 918    | 168    | 232   |
| GTT | 4835   | 3587   | 1517   | 105    | 38    |
| TAA | 982    | 726    | 377    | 78     | 19    |
| TAC | 1546   | 1078   | 504    | 27     | 8     |
| TAG | 480221 | 557142 | 520026 | 29487  | 748   |
| TAT | 3431   | 2451   | 1159   | 96     | 54    |
| TCA | 1446   | 1012   | 458    | 114    | 108   |
| TCC | 3193   | 2310   | 987    | 280    | 218   |
| TCG | 2341   | 1637   | 743    | 66     | 27    |
| TCT | 5409   | 3942   | 1318   | 62     | 46    |
| TGA | 1491   | 1102   | 6488   | 2360   | 4861  |
| TGC | 2200   | 1380   | 3384   | 6112   | 3109  |
| TGG | 2355   | 1503   | 981    | 150    | 120   |
| TGT | 5298   | 3668   | 9502   | 17836  | 10468 |
| TTA | 2946   | 2092   | 12455  | 56753  | 34964 |
| TTC | 5331   | 3782   | 1591   | 192    | 95    |
| TTG | 5244   | 3839   | 20447  | 108780 | 67635 |
| TTT | 11424  | 8421   | 3202   | 398    | 214   |

|       |        |        |        |        |        |
|-------|--------|--------|--------|--------|--------|
| Total | 623561 | 665301 | 713961 | 545206 | 356758 |
|-------|--------|--------|--------|--------|--------|

**tyrS.d7 UAG->NNN codon selection**

| Codon | 1 hr | 4 hr | Confluent 1 | Confluent 2 | Confluent 3 |
|-------|------|------|-------------|-------------|-------------|
| AAA   | 27   | 13   | 7           | 0           | 0           |
| AAC   | 56   | 30   | 11          | 0           | 0           |
| AAG   | 260  | 126  | 332         | 6           | 1           |
| AAT   | 116  | 42   | 27          | 0           | 0           |
| ACA   | 60   | 15   | 15          | 0           | 0           |
| ACC   | 111  | 49   | 22          | 0           | 0           |
| ACG   | 116  | 42   | 30          | 1           | 0           |
| ACT   | 197  | 66   | 65          | 25          | 9           |
| AGA   | 30   | 18   | 11          | 0           | 0           |
| AGC   | 19   | 11   | 8           | 0           | 1           |
| AGG   | 82   | 31   | 18          | 20          | 11          |
| AGT   | 123  | 54   | 22          | 1           | 0           |
| ATA   | 82   | 45   | 27          | 0           | 0           |
| ATC   | 137  | 50   | 32          | 14          | 6           |
| ATG   | 278  | 90   | 69          | 15          | 14          |
| ATT   | 341  | 117  | 108         | 28          | 5           |
| CAA   | 43   | 20   | 14          | 0           | 0           |
| CAC   | 65   | 19   | 21          | 1           | 0           |
| CAG   | 402  | 198  | 403         | 15          | 14          |
| CAT   | 217  | 76   | 74          | 0           | 0           |
| CCA   | 120  | 39   | 24          | 1           | 1           |
| CCC   | 143  | 60   | 38          | 2           | 1           |
| CCG   | 244  | 82   | 43          | 4           | 6           |
| CCT   | 313  | 127  | 99          | 3           | 0           |
| CGA   | 57   | 25   | 20          | 1           | 0           |
| CGC   | 14   | 7    | 8           | 2           | 0           |
| CGG   | 129  | 90   | 20          | 54          | 30          |
| CGT   | 223  | 108  | 42          | 0           | 0           |
| CTA   | 151  | 54   | 46          | 10          | 10          |
| CTC   | 262  | 120  | 62          | 47          | 14          |
| CTG   | 418  | 172  | 158         | 19597       | 32691       |
| CTT   | 674  | 280  | 202         | 58          | 43          |
| GAA   | 49   | 16   | 15          | 0           | 0           |
| GAC   | 47   | 24   | 20          | 1           | 1           |
| GAG   | 186  | 88   | 161         | 0           | 10          |
| GAT   | 205  | 76   | 60          | 1           | 0           |
| GCA   | 48   | 25   | 9           | 1           | 1           |
| GCC   | 101  | 47   | 32          | 0           | 1           |
| GCG   | 131  | 50   | 28          | 1           | 1           |
| GCT   | 215  | 95   | 71          | 3           | 5           |
| GGA   | 62   | 15   | 11          | 1           | 0           |
| GGC   | 24   | 18   | 9           | 1           | 0           |
| GGG   | 145  | 56   | 23          | 7           | 6           |
| GGT   | 185  | 77   | 56          | 1           | 0           |
| GTA   | 134  | 55   | 40          | 1           | 0           |
| GTC   | 144  | 88   | 39          | 11          | 3           |
| GTG   | 326  | 98   | 61          | 2           | 1           |



|       |        |        |        |        |        |
|-------|--------|--------|--------|--------|--------|
| GTT   | 554    | 185    | 128    | 13     | 3      |
| TAA   | 283    | 175    | 193    | 8      | 0      |
| TAC   | 303    | 147    | 129    | 73     | 34     |
| TAG   | 411640 | 403939 | 447328 | 26255  | 1126   |
| TAT   | 963    | 499    | 602    | 137    | 47     |
| TCA   | 168    | 66     | 56     | 2      | 0      |
| TCC   | 329    | 200    | 119    | 17     | 8      |
| TCG   | 786    | 342    | 247    | 16     | 6      |
| TCT   | 656    | 260    | 231    | 44     | 15     |
| TGA   | 211    | 68     | 112    | 58     | 61     |
| TGC   | 115    | 72     | 34     | 35     | 26     |
| TGG   | 1123   | 398    | 677    | 155810 | 81173  |
| TGT   | 846    | 321    | 168    | 150    | 78     |
| TTA   | 440    | 185    | 114    | 65     | 33     |
| TTC   | 684    | 267    | 399    | 78152  | 36911  |
| TTG   | 1991   | 777    | 683    | 896    | 409    |
| TTT   | 1611   | 640    | 873    | 148211 | 70444  |
| Total | 430215 | 411645 | 454806 | 429878 | 223260 |

**tyrS.d8 UAG->NNN codon selection**

| Codon | 1 hr | 4 hr | Confluent 1 | Confluent 2 | Confluent 3 |
|-------|------|------|-------------|-------------|-------------|
| AAA   | 276  | 125  | 94          | 0           | 0           |
| AAC   | 494  | 228  | 159         | 3           | 0           |
| AAG   | 434  | 178  | 170         | 2           | 2           |
| AAT   | 1018 | 490  | 294         | 7           | 0           |
| ACA   | 541  | 249  | 142         | 2           | 0           |
| ACC   | 1088 | 501  | 284         | 7           | 0           |
| ACG   | 747  | 312  | 233         | 6           | 0           |
| ACT   | 1956 | 912  | 510         | 4           | 1           |
| AGA   | 471  | 189  | 126         | 2           | 0           |
| AGC   | 721  | 288  | 171         | 3           | 0           |
| AGG   | 651  | 250  | 210         | 31          | 69          |
| AGT   | 1666 | 680  | 433         | 7           | 0           |
| ATA   | 1114 | 467  | 373         | 7           | 1           |
| ATC   | 1909 | 779  | 564         | 12          | 1           |
| ATG   | 1654 | 612  | 564         | 5           | 3           |
| ATT   | 4117 | 1858 | 1062        | 27          | 4           |
| CAA   | 512  | 230  | 160         | 6           | 0           |
| CAC   | 989  | 361  | 232         | 4           | 0           |
| CAG   | 782  | 352  | 349         | 11          | 23          |
| CAT   | 1992 | 917  | 504         | 4           | 0           |
| CCA   | 1066 | 576  | 226         | 4           | 0           |
| CCC   | 2253 | 950  | 483         | 9           | 7           |
| CCG   | 1649 | 685  | 428         | 11          | 5           |
| CCT   | 4266 | 1980 | 955         | 10          | 0           |
| CGA   | 832  | 359  | 219         | 3           | 1           |
| CGC   | 748  | 187  | 188         | 2           | 0           |
| CGG   | 1265 | 532  | 376         | 60          | 153         |
| CGT   | 3237 | 1387 | 780         | 11          | 9           |
| CTA   | 1995 | 878  | 564         | 18          | 4           |
| CTC   | 3719 | 1495 | 815         | 25          | 16          |

|       |        |       |       |        |        |
|-------|--------|-------|-------|--------|--------|
| CTG   | 3190   | 1277  | 989   | 528    | 1052   |
| CTT   | 8112   | 3416  | 2133  | 70     | 33     |
| GAA   | 433    | 196   | 119   | 3      | 0      |
| GAC   | 742    | 356   | 258   | 2      | 0      |
| GAG   | 627    | 269   | 287   | 2      | 38     |
| GAT   | 1674   | 792   | 485   | 3      | 2      |
| GCA   | 828    | 355   | 194   | 3      | 7      |
| GCC   | 1554   | 774   | 373   | 8      | 2      |
| GCG   | 1173   | 470   | 310   | 4      | 1      |
| GCT   | 3022   | 1399  | 664   | 17     | 12     |
| GGA   | 674    | 317   | 194   | 3      | 0      |
| GGC   | 983    | 373   | 273   | 3      | 0      |
| GGG   | 997    | 391   | 298   | 20     | 25     |
| GGT   | 2539   | 1184  | 729   | 9      | 0      |
| GTA   | 1618   | 750   | 432   | 5      | 1      |
| GTC   | 3022   | 1347  | 800   | 12     | 3      |
| GTG   | 2086   | 854   | 621   | 12     | 4      |
| GTT   | 6224   | 2963  | 1547  | 25     | 3      |
| TAA   | 1040   | 436   | 325   | 8      | 1      |
| TAC   | 2097   | 821   | 587   | 31     | 8      |
| TAG   | 12084  | 10879 | 8894  | 1224   | 423    |
| TAT   | 3950   | 1735  | 1067  | 52     | 24     |
| TCA   | 1867   | 785   | 515   | 9      | 0      |
| TCC   | 4061   | 1812  | 1061  | 21     | 2      |
| TCG   | 2668   | 1094  | 761   | 29     | 31     |
| TCT   | 7008   | 3123  | 1784  | 31     | 13     |
| TGA   | 1854   | 738   | 783   | 103    | 341    |
| TGC   | 2988   | 1127  | 659   | 49     | 81     |
| TGG   | 2665   | 1065  | 1205  | 159892 | 394007 |
| TGT   | 6867   | 3011  | 1840  | 212    | 431    |
| TTA   | 3955   | 1685  | 1233  | 50     | 24     |
| TTC   | 7511   | 3231  | 2173  | 1256   | 739    |
| TTG   | 6160   | 2577  | 1846  | 927    | 1218   |
| TTT   | 15458  | 6994  | 4496  | 15124  | 12233  |
| Total | 165893 | 77603 | 51603 | 180050 | 411058 |

**alaS.d5 UAG->NNN amino acid selection (normalized for number of codons decoding a given amino acid)**

| aa | 1 hr   | 4 hr   | Confluent 1 | Confluent 2 | Confluent 3 | # codons |
|----|--------|--------|-------------|-------------|-------------|----------|
| *  | 194403 | 187741 | 184100      | 101752      | 38161       | 3        |
| A  | 509    | 514    | 388         | 2441        | 6352        | 4        |
| C  | 837    | 956    | 840         | 4655        | 12615       | 2        |
| D  | 643    | 639    | 527         | 1035        | 842         | 2        |
| E  | 477    | 495    | 457         | 1941        | 3764        | 2        |
| F  | 780    | 920    | 909         | 5942        | 17131       | 2        |
| G  | 1625   | 1593   | 1541        | 2974        | 6117        | 4        |
| H  | 543    | 608    | 448         | 2819        | 7940        | 2        |
| I  | 719    | 736    | 633         | 4408        | 12653       | 3        |
| K  | 631    | 455    | 457         | 210         | 96          | 2        |
| L  | 660    | 739    | 641         | 4090        | 11856       | 6        |
| M  | 758    | 731    | 581         | 3542        | 9641        | 1        |
| N  | 520    | 622    | 485         | 3764        | 10771       | 2        |

|   |       |       |       |       |       |   |
|---|-------|-------|-------|-------|-------|---|
| P | 459   | 304   | 240   | 111   | 91    | 4 |
| Q | 608   | 598   | 517   | 2402  | 5690  | 2 |
| R | 445   | 272   | 230   | 84    | 79    | 6 |
| S | 772   | 754   | 716   | 3346  | 8956  | 6 |
| T | 504   | 530   | 361   | 2818  | 7848  | 4 |
| V | 1993  | 2004  | 1951  | 4609  | 11091 | 4 |
| W | 11110 | 10570 | 10425 | 11089 | 18011 | 1 |
| Y | 804   | 948   | 897   | 5115  | 15247 | 2 |

**adk.d4 UAG->NNN amino acid selection (normalized for number of codons decoding a given amino acid)**

| aa | 1 hr   | 4 hr  | Confluent 1 | Confluent 2 | Confluent 3 | # codons |
|----|--------|-------|-------------|-------------|-------------|----------|
| *  | 100281 | 94980 | 12268       | 302         | 160         | 3        |
| A  | 327    | 767   | 225         | 118         | 132         | 4        |
| C  | 1090   | 2210  | 6420        | 3242        | 761         | 2        |
| D  | 3273   | 3892  | 4335        | 3638        | 3419        | 2        |
| E  | 539    | 869   | 1012        | 890         | 1768        | 2        |
| F  | 963    | 2656  | 5700        | 2395        | 1084        | 2        |
| G  | 403    | 937   | 488         | 362         | 774         | 4        |
| H  | 283    | 721   | 148         | 69          | 86          | 2        |
| I  | 489    | 1375  | 17320       | 14818       | 13752       | 3        |
| K  | 278    | 591   | 92          | 35          | 46          | 2        |
| L  | 1793   | 2790  | 38508       | 39804       | 37932       | 6        |
| M  | 428    | 1072  | 15608       | 16600       | 15749       | 1        |
| N  | 275    | 715   | 124         | 41          | 47          | 2        |
| P  | 220    | 574   | 94          | 27          | 28          | 4        |
| Q  | 529    | 929   | 1922        | 1734        | 1654        | 2        |
| R  | 329    | 755   | 359         | 271         | 526         | 6        |
| S  | 367    | 984   | 188         | 104         | 104         | 6        |
| T  | 1952   | 2530  | 4958        | 3793        | 2368        | 4        |
| V  | 475    | 1346  | 16825       | 17816       | 18012       | 4        |
| W  | 483    | 1200  | 403         | 68          | 11          | 1        |
| Y  | 532    | 1332  | 6893        | 3886        | 2595        | 2        |

**adk.d6 UAG->NNN amino acid selection (normalized for number of codons decoding a given amino acid)**

| aa | 1 hr   | 4 hr   | Confluent 1 | Confluent 2 | Confluent 3 | # codons |
|----|--------|--------|-------------|-------------|-------------|----------|
| *  | 129026 | 117113 | 68581       | 1506        | 150         | 3        |
| A  | 735    | 338    | 203         | 168         | 137         | 4        |
| C  | 1513   | 632    | 408         | 506         | 371         | 2        |
| D  | 4789   | 3788   | 4387        | 4036        | 3071        | 2        |
| E  | 802    | 524    | 856         | 1807        | 2300        | 2        |
| F  | 2439   | 1040   | 313         | 136         | 81          | 2        |
| G  | 830    | 381    | 392         | 801         | 999         | 4        |
| H  | 668    | 318    | 175         | 93          | 67          | 2        |
| I  | 1112   | 570    | 3581        | 8119        | 6460        | 3        |
| K  | 606    | 371    | 180         | 56          | 73          | 2        |
| L  | 1466   | 771    | 26754       | 51363       | 37456       | 6        |
| M  | 981    | 484    | 13653       | 17237       | 9526        | 1        |
| N  | 651    | 334    | 123         | 50          | 41          | 2        |
| P  | 483    | 223    | 82          | 36          | 31          | 4        |
| Q  | 5497   | 4714   | 3840        | 2111        | 1528        | 2        |
| R  | 679    | 340    | 302         | 565         | 704         | 6        |

|   |      |      |       |       |       |   |
|---|------|------|-------|-------|-------|---|
| S | 1136 | 589  | 301   | 136   | 104   | 6 |
| T | 2847 | 2218 | 2607  | 2460  | 1828  | 4 |
| V | 1185 | 564  | 13460 | 20719 | 17135 | 4 |
| W | 1193 | 534  | 158   | 7     | 9     | 1 |
| Y | 1277 | 589  | 238   | 84    | 59    | 2 |

**pgk.d4 UAG->NNN amino acid selection (normalized for number of codons decoding a given amino acid)**

| aa | 1 hr   | 4 hr   | Confluent 1 | Confluent 2 | Confluent 3 | # codons |
|----|--------|--------|-------------|-------------|-------------|----------|
| *  | 200377 | 197796 | 139181      | 21561       | 3269        | 3        |
| A  | 864    | 559    | 2255        | 1892        | 3330        | 4        |
| C  | 1236   | 490    | 380         | 5970        | 1849        | 2        |
| D  | 554    | 239    | 205         | 70          | 114         | 2        |
| E  | 3260   | 2881   | 2742        | 3068        | 3106        | 2        |
| F  | 1993   | 921    | 1161        | 101183      | 120126      | 2        |
| G  | 579    | 235    | 165         | 54          | 78          | 4        |
| H  | 879    | 493    | 2583        | 2201        | 3954        | 2        |
| I  | 1134   | 458    | 344         | 3292        | 949         | 3        |
| K  | 6721   | 6138   | 4668        | 5522        | 4834        | 2        |
| L  | 1304   | 555    | 692         | 21377       | 13395       | 6        |
| M  | 988    | 404    | 286         | 29802       | 29054       | 1        |
| N  | 1186   | 776    | 579         | 545         | 502         | 2        |
| P  | 779    | 263    | 197         | 50          | 80          | 4        |
| Q  | 537    | 289    | 317         | 138         | 196         | 2        |
| R  | 677    | 351    | 589         | 390         | 618         | 6        |
| S  | 952    | 489    | 1589        | 1265        | 2251        | 6        |
| T  | 627    | 225    | 195         | 66          | 135         | 4        |
| V  | 1045   | 473    | 720         | 678         | 640         | 4        |
| W  | 995    | 455    | 307         | 22          | 15          | 1        |
| Y  | 1054   | 513    | 428         | 28819       | 29130       | 2        |

**metG.d3 UAG->NNN amino acid selection (normalized for number of codons decoding a given amino acid)**

| aa | 1 hr   | 4 hr   | Confluent 1 | Confluent 2 | Confluent 3 | # codons |
|----|--------|--------|-------------|-------------|-------------|----------|
| *  | 148462 | 145962 | 121522      | 23921       | 3571        | 3        |
| A  | 2524   | 2488   | 2397        | 2493        | 3178        | 4        |
| C  | 114    | 152    | 191         | 6938        | 8219        | 2        |
| D  | 93     | 96     | 137         | 144         | 248         | 2        |
| E  | 239    | 300    | 496         | 721         | 1393        | 2        |
| F  | 41     | 48     | 140         | 8546        | 10980       | 2        |
| G  | 134    | 160    | 324         | 127         | 258         | 4        |
| H  | 95     | 85     | 111         | 103         | 161         | 2        |
| I  | 215    | 295    | 654         | 31427       | 47256       | 3        |
| K  | 352    | 345    | 341         | 226         | 263         | 2        |
| L  | 78     | 95     | 321         | 19285       | 28407       | 6        |
| M  | 176    | 308    | 411         | 38425       | 68619       | 1        |
| N  | 127    | 118    | 104         | 91          | 106         | 2        |
| P  | 50     | 31     | 30          | 17          | 31          | 4        |
| Q  | 2523   | 2611   | 3039        | 2737        | 3691        | 2        |
| R  | 241    | 262    | 276         | 265         | 399         | 6        |
| S  | 532    | 553    | 632         | 648         | 889         | 6        |
| T  | 70     | 71     | 144         | 1657        | 1137        | 4        |
| V  | 80     | 85     | 195         | 8788        | 13682       | 4        |

|   |     |     |     |       |       |   |
|---|-----|-----|-----|-------|-------|---|
| W | 150 | 150 | 130 | 84    | 131   | 1 |
| Y | 148 | 219 | 258 | 10246 | 12095 | 2 |

**tyrS.d6 UAG->NNN amino acid selection (normalized for number of codons decoding a given amino acid)**

| aa | 1 hr   | 4 hr   | Confluent 1 | Confluent 2 | Confluent 3 | # codons |
|----|--------|--------|-------------|-------------|-------------|----------|
| *  | 160898 | 186323 | 175630      | 10642       | 1876        | 3        |
| A  | 2467   | 2001   | 5088        | 9047        | 7042        | 4        |
| C  | 3749   | 2524   | 6443        | 11974       | 6789        | 2        |
| D  | 1043   | 747    | 341         | 76          | 66          | 2        |
| E  | 505    | 388    | 1622        | 434         | 1294        | 2        |
| F  | 8378   | 6102   | 2397        | 295         | 155         | 2        |
| G  | 974    | 645    | 282         | 22          | 30          | 4        |
| H  | 1226   | 908    | 461         | 202         | 149         | 2        |
| I  | 1694   | 1227   | 717         | 88          | 44          | 3        |
| K  | 359    | 288    | 283         | 33          | 71          | 2        |
| L  | 3513   | 2628   | 15386       | 69380       | 45734       | 6        |
| M  | 1336   | 889    | 2107        | 1140        | 294         | 1        |
| N  | 587    | 429    | 209         | 45          | 28          | 2        |
| P  | 4356   | 3508   | 4895        | 5757        | 5134        | 4        |
| Q  | 960    | 917    | 892         | 530         | 426         | 2        |
| R  | 942    | 599    | 269         | 45          | 50          | 6        |
| S  | 2382   | 1682   | 1148        | 237         | 501         | 6        |
| T  | 2730   | 2644   | 2330        | 1644        | 1331        | 4        |
| V  | 2597   | 1871   | 921         | 145         | 179         | 4        |
| W  | 2355   | 1503   | 981         | 150         | 120         | 1        |
| Y  | 2489   | 1765   | 832         | 62          | 31          | 2        |

**tyrS.d7 UAG->NNN amino acid selection (normalized for number of codons decoding a given amino acid)**

| aa | 1 hr   | 4 hr   | Confluent 1 | Confluent 2 | Confluent 3 | # codons |
|----|--------|--------|-------------|-------------|-------------|----------|
| *  | 137378 | 134727 | 149211      | 8774        | 396         | 3        |
| A  | 124    | 54     | 35          | 1           | 2           | 4        |
| C  | 481    | 197    | 101         | 93          | 52          | 2        |
| D  | 126    | 50     | 40          | 1           | 1           | 2        |
| E  | 118    | 52     | 88          | 0           | 5           | 2        |
| F  | 1148   | 454    | 636         | 113182      | 53678       | 2        |
| G  | 104    | 42     | 25          | 3           | 2           | 4        |
| H  | 141    | 48     | 48          | 1           | 0           | 2        |
| I  | 187    | 71     | 56          | 14          | 4           | 3        |
| K  | 144    | 70     | 170         | 3           | 1           | 2        |
| L  | 656    | 265    | 211         | 3446        | 5533        | 6        |
| M  | 278    | 90     | 69          | 15          | 14          | 1        |
| N  | 86     | 36     | 19          | 0           | 0           | 2        |
| P  | 205    | 77     | 51          | 3           | 2           | 4        |
| Q  | 223    | 109    | 209         | 8           | 7           | 2        |
| R  | 89     | 47     | 20          | 13          | 7           | 6        |
| S  | 347    | 156    | 114         | 13          | 5           | 6        |
| T  | 121    | 43     | 33          | 7           | 2           | 4        |
| V  | 290    | 107    | 67          | 7           | 2           | 4        |
| W  | 1123   | 398    | 677         | 155810      | 81173       | 1        |
| Y  | 633    | 323    | 366         | 105         | 41          | 2        |

**tyrS.d8 UAG->NNN amino acid selection (normalized for number of codons decoding a given amino acid)**

| <b>aa</b> | <b>1 hr</b> | <b>4 hr</b> | <b>Confluent 1</b> | <b>Confluent 2</b> | <b>Confluent 3</b> | <b># codons</b> |
|-----------|-------------|-------------|--------------------|--------------------|--------------------|-----------------|
| *         | 4993        | 4018        | 3334               | 445                | 255                | 3               |
| A         | 1644        | 750         | 385                | 8                  | 6                  | 4               |
| C         | 4928        | 2069        | 1250               | 131                | 256                | 2               |
| D         | 1208        | 574         | 372                | 3                  | 1                  | 2               |
| E         | 530         | 233         | 203                | 3                  | 19                 | 2               |
| F         | 11485       | 5113        | 3335               | 8190               | 6486               | 2               |
| G         | 1298        | 566         | 374                | 9                  | 6                  | 4               |
| H         | 1491        | 639         | 368                | 4                  | 0                  | 2               |
| I         | 2380        | 1035        | 666                | 15                 | 2                  | 3               |
| K         | 355         | 152         | 132                | 1                  | 1                  | 2               |
| L         | 4522        | 1888        | 1263               | 270                | 391                | 6               |
| M         | 1654        | 612         | 564                | 5                  | 3                  | 1               |
| N         | 756         | 359         | 227                | 5                  | 0                  | 2               |
| P         | 2309        | 1048        | 523                | 9                  | 3                  | 4               |
| Q         | 647         | 291         | 255                | 9                  | 12                 | 2               |
| R         | 1201        | 484         | 317                | 18                 | 39                 | 6               |
| S         | 2999        | 1297        | 788                | 17                 | 8                  | 6               |
| T         | 1083        | 494         | 292                | 5                  | 0                  | 4               |
| V         | 3238        | 1479        | 850                | 14                 | 3                  | 4               |
| W         | 2665        | 1065        | 1205               | 159892             | 394007             | 1               |
| Y         | 3024        | 1278        | 827                | 42                 | 16                 | 2               |

**Supplementary Table 7 | Doubling times of leucine and tryptophan variants of adk.d6, tyrS.d7 and tyrS.d8**

| Strain <sup>a</sup>  | Variant | Clone | Permissive media    |                      |                       | Nonpermissive media |                      |                       |
|----------------------|---------|-------|---------------------|----------------------|-----------------------|---------------------|----------------------|-----------------------|
|                      |         |       | Avg. Tdouble (min.) | Tdouble s.e.m. (min) | Max OD <sub>600</sub> | Avg. Tdouble (min.) | Tdouble s.e.m. (min) | Max OD <sub>600</sub> |
| adk.d6               | Leu     | 1     | 70                  | 1                    | 0.98                  | 124                 | 2                    | 0.85                  |
| adk.d6               | Leu     | 2     | 68                  | 0                    | 0.98                  | 141                 | 1                    | 0.58                  |
| adk.d6               | Leu     | 3     | 75                  | 1                    | 0.93                  | 133                 | 1                    | 0.70                  |
| tyrS.d7              | Trp     | 1     | 156                 | 6                    | 0.96                  | 248                 | 9                    | 0.66                  |
| tyrS.d7              | Trp     | 2     | 179                 | 4                    | 0.98                  | 288                 | 12                   | 0.57                  |
| tyrS.d7              | Trp     | 3     | 198                 | 9                    | 0.95                  | 288                 | 9                    | 0.59                  |
| tyrS.d8              | Trp     | 1     | 161                 | 4                    | 1.10                  | 148                 | 7                    | 0.95                  |
| tyrS.d8              | Trp     | 2     | 276                 | 13                   | 1.13                  | 267                 | 8                    | 0.66                  |
| tyrS.d7 <sup>b</sup> | Leu     | 1     | nd                  | nd                   | nd                    | no growth           | no growth            | no growth             |
| tyrS.d7 <sup>b</sup> | Leu     | 2     | nd                  | nd                   | nd                    | no growth           | no growth            | no growth             |
| tyrS.d7 <sup>b</sup> | Leu     | 3     | nd                  | nd                   | nd                    | no growth           | no growth            | no growth             |

<sup>a</sup> We were unable to produce adk.d6 bipA->Trp or tyrS.d8 bipA->Leu variants

<sup>b</sup> tyrS.d7 Leu variants were confirmed by Sanger sequencing, but did not grow in nonpermissive liquid media

**Supplementary Table 8 | Viability of *adk* synthetic auxotrophs in stationary phase**

| <b>Condition</b>               | <b>Measured OD<sub>600</sub></b> | <b>Viable c.f.u./ml</b> |
|--------------------------------|----------------------------------|-------------------------|
| adk.d4-SCAB10-mid log          | 0.6                              | 2.83 x 10 <sup>8</sup>  |
| adk.d4-SCAB10-late log         | 0.96                             | 5.43 x 10 <sup>8</sup>  |
| adk.d4-SCAB10-stationary       | 1.2                              | 1.60 x 10 <sup>7</sup>  |
| adk.d4-SCAB50-mid log          | 0.65                             | 2.47 x 10 <sup>8</sup>  |
| adk.d4-SCAB50-late log         | 1.2                              | 6.33 x 10 <sup>8</sup>  |
| adk.d4-SCAB50-stationary       | 2                                | 3.13 x 10 <sup>8</sup>  |
| adk.d6-SCAB10-late log         | 1.1                              | 6.20 x 10 <sup>8</sup>  |
| adk.d6-SCAB10-early stationary | 2.1                              | 1.83 x 10 <sup>9</sup>  |
| adk.d6-SCAB10-late stationary  | 2.6                              | 3.30 x 10 <sup>9</sup>  |
| adk.d6-SCAB50-mid log          | 0.5                              | 2.30 x 10 <sup>8</sup>  |
| adk.d6-SCAB50-stationary       | 2.4                              | 1.27 x 10 <sup>9</sup>  |



**Supplementary Table 9 | Escape mechanisms uncovered by whole-genome sequencing**

| <b>Strain name</b>   | <b>Media condition</b> | <b>Escape mechanism</b>                |
|----------------------|------------------------|----------------------------------------|
| adk.d6_esc-1         | permissive             | frame shift in lon at nt 459009        |
| adk.d6_esc-2         | non-permissive         | structural event upstream of lon       |
| adk.d6_esc-3         | non-permissive         | structural event upstream of lon       |
| adk.d6_esc-4         | non-permissive         | structural event upstream of lon       |
| tyrS.d8_esc-1        | permissive             | tyrS A70V mutation at nt 1721829       |
| tyrS.d8_esc-2        | non-permissive         | tyrS A70V mutation at nt 1721829       |
| tyrS.d8_esc-3        | non-permissive         | tyrS A70V mutation at nt 1721829       |
| tyrS.d8_esc-4        | non-permissive         | tyrS A70V mutation at nt 1721829       |
| adk.d6_tyrS.d8_esc-1 | permissive             | mutation in lon (nt:T459768C aa:L611P) |
| adk.d6_tyrS.d8_esc-2 | permissive             | structural event upstream of lon       |
| adk.d6_tyrS.d8_esc-3 | permissive             | structural event upstream of lon       |

Supplementary Table 10 | *tyrS.A70V* growth rates

| Strain                 | bipA concentration ( $\mu\text{M}$ ) |                   |                |                |                |                 |
|------------------------|--------------------------------------|-------------------|----------------|----------------|----------------|-----------------|
|                        | 0                                    | 0.5               | 1              | 5              | 10             | 50              |
| <i>tyrS.A70V_esc-1</i> | 295.9 $\pm$ 8.9                      | 86.9 $\pm$ 0.7    | 72.4 $\pm$ 0.3 | 62.9 $\pm$ 1.8 | 66.0 $\pm$ 0.2 | 90.6 $\pm$ 0.6  |
| <i>tyrS.A70V_esc-2</i> | 318.7 $\pm$ 25.1                     | 97.1 $\pm$ 0.8    | 73.2 $\pm$ 0.5 | 64.7 $\pm$ 0.2 | 66.0 $\pm$ 0.4 | 96.1 $\pm$ 0.4  |
| <i>tyrS.A70V_esc-3</i> | 484.1 $\pm$ 16.0                     | 89.5 $\pm$ 0.6    | 70.5 $\pm$ 0.3 | 66.6 $\pm$ 0.2 | 69.3 $\pm$ 0.2 | 116.5 $\pm$ 1.6 |
| <i>tyrS.d8</i>         | no growth                            | 465.0 $\pm$ 177.0 | 84.2 $\pm$ 0.8 | 68.2 $\pm$ 0.3 | 68.9 $\pm$ 0.3 | 130.4 $\pm$ 1.5 |
| C321. $\Delta$ A       | 64.4 $\pm$ 0.1                       | 62.6 $\pm$ 0.2    | 62.3 $\pm$ 0.2 | 60.6 $\pm$ 0.2 | 61.8 $\pm$ 0.4 | 89.2 $\pm$ 1.2  |

**Supplementary Table 11 | Escape and growth rates of natural metabolic auxotrophs**

| Strain         | Escape assay plate media    | Day 1 esc. frequency | Day 2 esc. frequency | Day 7 esc. frequency | Doubling time in LB <sup>L</sup> + DAP + thymidine |
|----------------|-----------------------------|----------------------|----------------------|----------------------|----------------------------------------------------|
| EcNR1ΔthyA     | LB <sup>L</sup>             | < 3.51E-11           | 2.70E-09 ± 1.20E-10  | 7.40E-08 ± 5.14E-09  | 43.6 ± 0.2                                         |
| EcNR1Δasd      | LB <sup>L</sup>             | < 5.98E-10           | 5.98E-10 ± 5.38E-10  | 8.97E-09 ± 5.46E-09  | 47.7 ± 0.3                                         |
| EcNR1ΔasdΔthyA | LB <sup>L</sup>             | < 1.83E-10           | < 1.83E-10           | 8.79E-09 ± 4.81E-09  | 57.5 ± 0.2                                         |
| EcNR1ΔasdΔthyA | LB <sup>L</sup> + thymidine | < 5.49E-10           | 1.10E-09 ± 5.65E-10  | 2.86E-08 ± 4.40E-09  | n.a.                                               |

Errors reported are s.e.m. of the rate (Methods)

< Indicates below given detection limit

n.a. = not applicable

Supplementary Table 12 | Allele reversion frequencies in conjugal escapees

| Gene   | UAG Position | adk.d4          |               | adk.d6          |               | tyrS.d6         |               | tyrS.d7         |               | tyrS.d8         |               | adk.d6 tyrS.d6  |               | adk.d6 tyrS.d7  |               | adk.d6 tyrS.d8  |               | adk.d6 tyrS.d8_asd |               |
|--------|--------------|-----------------|---------------|-----------------|---------------|-----------------|---------------|-----------------|---------------|-----------------|---------------|-----------------|---------------|-----------------|---------------|-----------------|---------------|--------------------|---------------|
|        |              | 15              | n.a.          | 51              | 6             | 16              | n.a.          | 15              | n.a.          | 44              | 7             | 8               | n.a.          | 6               | n.a.          | 8               | 59            | 5                  | 38            |
| N =    |              | 50 minute conj. | 12 hour conj. | 50 minute conj.    | 12 hour conj. |
| murF   | 96008        | 0.267           | n.d.          | 0.020           | 0.000         | 0.000           | n.d.          | 0.000           | n.d.          | 0.020           | 0.000         | 1.000           | n.d.          | 1.000           | n.d.          | 1.000           | 0.542         | 1.000              | 0.895         |
| yaiS   | 383283       | 0.867           | n.d.          | 0.667           | 0.500         | 0.000           | n.d.          | 0.000           | n.d.          | 0.020           | 0.000         | 1.000           | n.d.          | 1.000           | n.d.          | 1.000           | 0.814         | 1.000              | 0.895         |
| lon    | 460466       | 1.000           | n.d.          | 0.745           | 0.833         | 0.000           | n.d.          | 0.000           | n.d.          | 0.020           | 0.000         | 1.000           | n.d.          | 1.000           | n.d.          | 1.000           | 0.966         | 1.000              | 0.947         |
| adk    | 497043       | 1.000           | n.d.          | 1.000           | 1.000         | 0.000           | n.d.          | 0.000           | n.d.          | 0.020           | 0.000         | 1.000           | n.d.          | 1.000           | n.d.          | 1.000           | 1.000         | 1.000              | 1.000         |
| ybhS   | 825342       | 0.267           | n.d.          | 0.078           | 0.000         | 0.000           | n.d.          | 0.000           | n.d.          | 0.039           | 0.143         | 1.000           | n.d.          | 1.000           | n.d.          | 1.000           | 0.949         | 1.000              | 0.974         |
| lolA   | 937206       | 0.267           | n.d.          | 0.039           | 0.000         | 0.000           | n.d.          | 0.000           | n.d.          | 0.039           | 0.143         | 1.000           | n.d.          | 1.000           | n.d.          | 1.000           | 0.949         | 1.000              | 0.947         |
| ycal   | 965807       | 0.267           | n.d.          | 0.039           | 0.000         | 0.000           | n.d.          | 0.000           | n.d.          | 0.039           | 0.143         | 1.000           | n.d.          | 1.000           | n.d.          | 1.000           | 0.949         | 1.000              | 0.921         |
| fabH   | 1148935      | 0.267           | n.d.          | 0.020           | 0.000         | 0.000           | n.d.          | 0.000           | n.d.          | 0.039           | 0.143         | 1.000           | n.d.          | 1.000           | n.d.          | 1.000           | 0.949         | 1.000              | 0.947         |
| hemA   | 1264193      | 0.267           | n.d.          | 0.020           | 0.000         | 0.000           | n.d.          | 0.000           | n.d.          | 0.098           | 0.429         | 1.000           | n.d.          | 1.000           | n.d.          | 1.000           | 0.966         | 1.000              | 0.974         |
| prfA   | 1265317      | 0.267           | n.d.          | 0.020           | 0.000         | 0.000           | n.d.          | 0.000           | n.d.          | 0.098           | 0.429         | 1.000           | n.d.          | 1.000           | n.d.          | 1.000           | 0.966         | 1.000              | 0.974         |
| pspF   | 1364959      | 0.267           | n.d.          | 0.020           | 0.000         | 0.000           | n.d.          | 0.000           | n.d.          | 0.137           | 0.571         | 1.000           | n.d.          | 1.000           | n.d.          | 1.000           | 0.915         | 1.000              | 0.974         |
| tyrS   | 1713972      | 0.000           | n.d.          | 0.000           | 0.000         | 1.000           | n.d.          | 1.000           | n.d.          | 1.000           | 1.000         | 1.000           | n.d.          | 1.000           | n.d.          | 1.000           | 1.000         | 1.000              | 1.000         |
| ydiE   | 1787828      | 0.267           | n.d.          | 0.020           | 0.000         | 0.500           | n.d.          | 0.200           | n.d.          | 0.608           | 0.714         | 1.000           | n.d.          | 1.000           | n.d.          | 1.000           | 0.831         | 1.000              | 0.974         |
| rcsC   | 2315049      | 0.267           | n.d.          | 0.020           | 0.000         | 0.063           | n.d.          | 0.000           | n.d.          | 0.020           | 0.000         | 1.000           | n.d.          | 1.000           | n.d.          | 1.000           | 0.492         | 1.000              | 0.842         |
| hda    | 2616097      | 0.267           | n.d.          | 0.020           | 0.000         | 0.000           | n.d.          | 0.000           | n.d.          | 0.020           | 0.000         | 1.000           | n.d.          | 1.000           | n.d.          | 1.000           | 0.373         | 1.000              | 0.789         |
| srlE   | 2825373      | 0.267           | n.d.          | 0.020           | 0.000         | 0.000           | n.d.          | 0.000           | n.d.          | 0.020           | 0.000         | 1.000           | n.d.          | 1.000           | n.d.          | 1.000           | 0.271         | 1.000              | 0.816         |
| nlpI   | 3306062      | 0.267           | n.d.          | 0.020           | 0.000         | 0.000           | n.d.          | 0.000           | n.d.          | 0.020           | 0.000         | 1.000           | n.d.          | 1.000           | n.d.          | 1.000           | 0.220         | 1.000              | 0.842         |
| mreC   | 3396897      | 0.267           | n.d.          | 0.020           | 0.000         | 0.000           | n.d.          | 0.000           | n.d.          | 0.020           | 0.000         | 1.000           | n.d.          | 1.000           | n.d.          | 1.000           | 0.220         | 1.000              | 0.842         |
| xylR   | 3734180      | 0.267           | n.d.          | 0.020           | 0.000         | 0.000           | n.d.          | 0.000           | n.d.          | 0.020           | 0.000         | 1.000           | n.d.          | 1.000           | n.d.          | 1.000           | 0.220         | 1.000              | 0.947         |
| coaD   | 3808327      | 0.267           | n.d.          | 0.020           | 0.000         | 0.000           | n.d.          | 0.000           | n.d.          | 0.020           | 0.000         | 1.000           | n.d.          | 1.000           | n.d.          | 1.000           | 0.237         | 1.000              | 0.947         |
| yidS   | 3868464      | 0.267           | n.d.          | 0.020           | 0.000         | 0.000           | n.d.          | 0.000           | n.d.          | 0.020           | 0.000         | 1.000           | n.d.          | 1.000           | n.d.          | 1.000           | 0.288         | 1.000              | 0.947         |
| rbsB   | 3935191      | 0.267           | n.d.          | 0.020           | 0.000         | 0.000           | n.d.          | 0.000           | n.d.          | 0.020           | 0.000         | 1.000           | n.d.          | 1.000           | n.d.          | 1.000           | 0.305         | 1.000              | 0.921         |
| insN-2 | 4505486      | 0.267           | n.d.          | 0.020           | 0.000         | 0.000           | n.d.          | 0.000           | n.d.          | 0.020           | 0.000         | 1.000           | n.d.          | 1.000           | n.d.          | 1.000           | 0.339         | 1.000              | 0.842         |

N = number of escapees assayed by mascPCR

n.a. = not applicable

n.d. = not determined (12 hr conjugation escape assays were only performed for adk.d6\_tyrS.d8\_asd and its component single- and double-enzyme synthetic auxotrophs adk.d6, tyrS.d8 and adk.d6\_tyrS.d8)

## SUPPLEMENTARY DISCUSSION

**Structure determination of a NSAA-dependent enzyme.** We used X-ray crystallography to test the accuracy of our computational methods, and to explore the structural implications of introducing a NSAA into an enzyme core. We determined the crystal structure of tyrS.d7, one of the eight tyrS variants predicted from all-atom computational models, which showed strong dependence on bipA in both solid and liquid media assays, to 2.65 Å resolution (Extended Data Table 1). Two full-length protein constructs are present in the asymmetric unit (chain A and chain B), and their overall structures are comparable. Here we describe the refined model for chain A, which is considerably more ordered than the other molecule. The engineered enzyme is composed of two domains connected by a short  $\alpha$ -helix (Extended Data Fig. 3a) and several flanking loops. The C-terminal tRNA recognition domain displays a topologically similar structure to the corresponding region of *T. thermophilus* TyrS<sup>1</sup> (PDB code 1H3E) (Extended Data Fig. 3b), the only full-length bacterial tyrosyl-tRNA synthetase with a determined crystal structure prior to this study. The N-terminal domain that catalyzes tyrosine activation is closely superimposable on the crystal structure of the wild-type enzyme<sup>2</sup> (Extended Data Fig. 3c; PDB code 1X8X, C $\alpha$  root mean square deviation [r.m.s.d.] = 1.0 Å) except for a long loop consisting of residues 226-245. The loop is largely disordered, probably due to the introduction of compensatory substitution F236A that was predicted to resolve steric clashes for F236 with L303bipA and F271W. Although this region, known as the KMSKS loop, is important for the catalytic mechanism of the enzyme<sup>3</sup>, the increased disorder of this loop observed in tyrS.d7 does not substantially impair viability (Fig. 2, Supplementary Table 4). Strong density consistent with a bound tyrosine molecule is observed in the substrate binding pocket as previously observed in the wild type TyrS-tyrosine co-crystal structure (Extended Data Fig. 3d)<sup>2</sup>. The presence of

substrate indicates that the redesigned enzyme retains the ability to tightly bind *L*-tyrosine, since no additional tyrosine was added during protein purification or crystallization. Out of seven amino acid substitutions that were introduced in the engineered protein, six (including bipA at residue 303) are clearly visible and lead to very minor conformational changes in the backbone helices (Fig. 1b-d). The side chain rotameric conformations for all six of these redesigned positions agree with the computationally predicted model (Fig. 1d). Redesigned position F236A is on the disordered KMSKS loop and thus is not observed.

**Competition between synthetic auxotroph escapees and prototrophs.** Any biocontainment mechanism – however robust – is vulnerable to evolutionary pathways through the fitness landscape that lead to survival in nonpermissive conditions. Although escape pathways may be exceedingly rare, it is critical that genotypes along these pathways sufficiently decrease fitness so that escapees are outcompeted in natural ecosystems. In this respect toxin/antitoxin systems are disadvantaged because the primary escape mechanism – ejecting the toxic gene – typically improves fitness. In contrast, escapees of our synthetic auxotrophs are highly impaired under nonpermissive growth conditions (Supplementary Table 4). We quantified the ability of escaped synthetic auxotrophs to compete in an ecosystem using a flow cytometry-based competition assay (Fig. 4).

We clonally isolated escapee strains that emerged both from single-enzyme (pgk.d4) and double-enzyme (adk.d6\_tyrS.d8) synthetic auxotrophs and competed them against C321.ΔA, used here as a proxy for prototrophic environmental competitors. From an initial seeding density 100-fold higher than the prototrophs, the single-enzyme pgk.d4 escapees maintain a significant presence (>50% of the total population) as resources become limiting after 8 hours of growth (Fig. 4a).

The continued presence of pgk.d4 in the 8 hour population arises from escapees growing in nonpermissive conditions, even though fitness is impaired in comparison to the prototroph. In contrast, under identical seeding conditions, the prototrophic strain completely overtakes the adk.d6\_tyrS.d8 escapees, inverting their relative abundance within 8 hours (Fig. 4b). This extreme effect is largely due to the severe fitness impairment of the adk.d6\_tyrS.d8 escapees in nonpermissive conditions. Further, these results emphasize that cross-feeding from prototrophic co-cultures cannot circumvent synthetic auxotrophies. Thus, while GMOs biocontained by multiple synthetic auxotrophies may explore mutations conferring nominal viability under nonpermissive conditions, the associated fitness impairment renders them readily outcompeted by prototrophic microbial competitors.

**Quadruplet codon decoding.** One possible class of escape mechanisms includes host modifications that suppress recoded UAG positions, such as mutations in endogenous tRNAs or ribosomal subunits. We attempted to safeguard against general suppression of the UAG triplet by mutating UAG in the designed enzymes to UAGA and introducing orthogonal quadruplet codon decoding machinery<sup>4</sup> in adk.d6. This strategy yielded a strain with reduced fitness (1.31-fold increase in doubling time) and a ~4-fold increase in 7 day escape frequency (adk.d6\_quad, Supplementary Tables 4 and 5). The increase in escape frequency could arise from reduced fitness of the parental auxotroph, and suggests that host modifications to recognize UAG codons are not primary escape mechanisms for adk.d6.

**adk.d4 exhibits poor survivability in stationary phase.** Cultures of adk.d4 and adk.d6 were grown in permissive media containing 10  $\mu$ M bipA (SCAB10) or 50  $\mu$ M bipA (SCAB50). Cell

density at different growth phases was monitored by comparing viable c.f.u. versus  $OD_{600}$  (Supplemental Table 8). Strain adk.d6 exhibited the best survival in permissive media containing SCAB10, while SCAB50 was slightly toxic. Strain adk.d4 grew to a lower maximum  $OD_{600}$  than adk.d6 under both growth conditions, and its c.f.u./ml did not track with  $OD_{600}$ . This suggests that a considerable fraction of the biomass (observed by  $OD_{600}$ ) is no longer viable (observed by c.f.u.).



## SUPPLEMENTARY REFERENCES

- 1 Yaremchuk, A., Kriklivyi, I., Tukalo, M. & Cusack, S. Class I tyrosyl-tRNA synthetase has a class II mode of cognate tRNA recognition. *EMBO J* **21**, 3829-3840, doi:10.1093/emboj/cdf373 (2002).
- 2 Kobayashi, T. *et al.* Structural snapshots of the KMSKS loop rearrangement for amino acid activation by bacterial tyrosyl-tRNA synthetase. *J Mol Biol* **346**, 105-117, doi:10.1016/j.jmb.2004.11.034 (2005).
- 3 Fersht, A. R., Knill-Jones, J. W., Bedouelle, H. & Winter, G. Reconstruction by site-directed mutagenesis of the transition state for the activation of tyrosine by the tyrosyl-tRNA synthetase: a mobile loop envelopes the transition state in an induced-fit mechanism. *Biochemistry* **27**, 1581-1587 (1988).
- 4 Chatterjee, A., Lajoie, M. J., Xiao, H., Church, G. M. & Schultz, P. G. A bacterial strain with a unique quadruplet codon specifying non-native amino acids. *ChemBiochem* **15**, 1782-1786, doi:10.1002/cbic.201402104 (2014).
